1  
2  
3  
4 IRE1 $\alpha$ -XBP1 Activation Elicited by Viral Singled Stranded RNA via TLR8  
5 May Modulate Lung Cytokine Induction in SARS-CoV-2 Pneumonia  
6

7 José J. Fernández<sup>1</sup>, Cristina Mancebo<sup>1,2</sup>, Sonsoles Garcinuño<sup>3</sup>, Gabriel March<sup>3</sup>, Yolanda  
8 Alvarez<sup>1,2</sup>, Sara Alonso<sup>1</sup>, Luis Inglada<sup>4</sup>, Jesús Blanco<sup>5,6</sup>, Antonio Orduña<sup>3</sup>, Olimpio Montero<sup>1</sup>,  
9 Tito A. Sandoval<sup>7,8,9</sup>, Juan R. Cubillos-Ruiz<sup>7,8,9</sup>, Elena Bustamante<sup>10</sup>, Nieves Fernández<sup>1,2,¶</sup>,  
10 Mariano Sánchez Crespo<sup>1¶\*</sup>

11  
12 <sup>1</sup>Unidad de Excelencia Instituto de Biología y Genética Molecular, CSIC-Universidad de  
13 Valladolid, Spain

14  
15 <sup>2</sup>Departamento de Bioquímica, Biología Molecular y Fisiología, Universidad de Valladolid,  
16 Spain

17  
18 <sup>3</sup>Servicio de Microbiología, Hospital Clínico Universitario de Valladolid, Universidad de  
19 Valladolid, Spain

20  
21 <sup>4</sup>Servicio de Medicina Interna, Hospital Universitario Rio-Hortega, Valladolid, Spain

22  
23 <sup>5</sup>Servicio de Medicina Intensiva, Hospital Universitario Rio-Hortega, Valladolid, Spain

24  
25 <sup>6</sup>CIBER de Enfermedades Respiratorias, Instituto de Salud Carlos III, Madrid, Spain

26  
27 <sup>7</sup>Weill Cornell Graduate School of Medical Sciences, Cornell University, New York, NY,  
28 10065, USA

29  
30 <sup>8</sup>Department of Obstetrics and Gynecology, Weill Cornell Medicine, New York, NY, 10065,  
31 USA

32  
33 <sup>9</sup>Sandra and Edward Meyer Cancer Center, Weill Cornell Medicine, New York, NY, 10065,  
34 USA

35  
36 <sup>10</sup>Servicio de Medicina Intensiva, Hospital Clínico Universitario de Valladolid, Spain

37  
38  
39 \* Corresponding author  
40 E-mail: [sanchezcrespomariano@gmail.com](mailto:sanchezcrespomariano@gmail.com) (M.S.C.)

41  
42 ¶These authors contributed equally to this work.  
43  
44  
45  
46  
47  
48  
49

51  
52  
53  
54  
55  
56  
57  
58  
59  
60  
61  
62  
63  
64  
65  
66  
67  
68  
69  
70  
71  
72  
73  
74

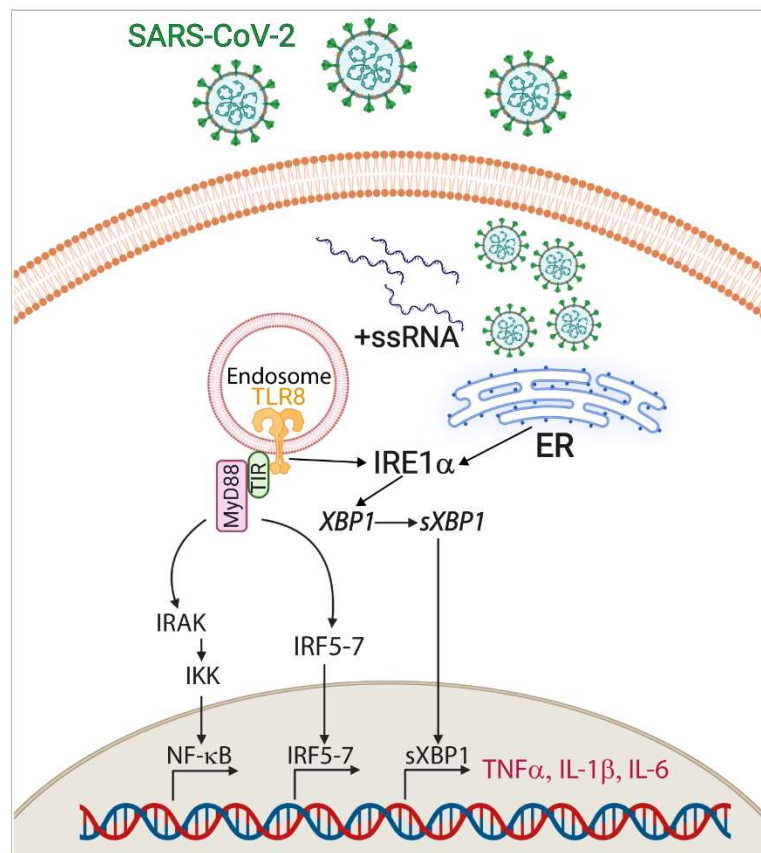

75

## 76 Abstract

77

78 Initial symptoms of COVID-19 infection depend on viral replication, while hyperinflammation  
79 is a hallmark of critical illness and may drive severe pneumonia and death. Among the  
80 mechanisms potentially involved in the hyperinflammatory state, we focused on the unfolded  
81 protein response, because the IRE1 $\alpha$ -XBP1 branch can be activated as result of the  
82 endoplasmic reticulum stress produced by the overwhelming synthesis of viral components and  
83 synergizes with Toll-like receptor signaling to induce cytokine expression. Viral RNA may  
84 trigger the IRE1 $\alpha$ -XBP1 branch via TLR7/8 activation and like TLR2 and TLR4 may underpin  
85 cytokine expression trough *XBP1* splicing (*sXBP1*). The expression of *IL1B*, *IL6*, and *TNF*

86 mRNA in bronchoalveolar aspirates (BAAs) were higher in COVID-19 patients under  
87 mechanical ventilation and intubation who showed *sXBPI*. The scrutiny of  
88 monocytic/macrophagic markers during active infection showed a reduction of those involved  
89 in antigen presentation and survival, as well as the IFN stimulated gene *MXI*. These changes  
90 reverted after infection tests turned negative. In contrast, the expression of the mRNA of the  
91 serine protease *TMPRSS2* involved in S protein priming showed a high expression during  
92 active infection. *TLR8* mRNA showed an overwhelming expression as compared to *TLR7*  
93 mRNA, which suggests the presence of monocyte-derived dendritic cells (MDDCs). *In vitro*  
94 experiments in MDDCs activated with ssRNA40, a positive-sense, single-stranded RNA  
95 (+ssRNA) like SARS-CoV-2 RNA, induced *sXBPI* and the expression of IL-1 $\beta$ , IL-6, and  
96 TNF $\alpha$  at mRNA and protein levels. These responses were blunted by the IRE1 $\alpha$  ribonuclease  
97 inhibitor MKC8866. Given the analogies between the results observed in BAAs and the effects  
98 induced by +ssRNA in MDDCs, IRE1 $\alpha$  ribonuclease inhibition might be a druggable target in  
99 severe COVID-19 disease.

100

101

## 102 **Author summary**

103

104 COVID-19 pandemics put an unprecedented pressure on health systems. The need of new  
105 therapies urged research on the mechanisms triggered by the interaction of SARS-CoV-2 virus  
106 with host cells and the ensuing pathophysiology driving pneumonia and multiorgan failure.  
107 Hyperinflammation soon appeared as a mechanism involved in mortality that could even  
108 proceed after viral infection comes to an end. Hyperinflammation is supported by an  
109 inappropriate production of cytokines, and this explains the use of the term cytokine storm to  
110 refer to this phase of the disease.

111 Given that insight into the molecular mechanisms driving cytokine storm should focus on the  
112 interaction of viral components with immune cells, experiments addressing the effect of viral  
113 components on its cognate receptors were carried out. It was observed that viral RNA induces  
114 a cytokine pattern like the one observed in bronchoalveolar aspirates of COVID-19 patients  
115 with critical disease. Overall, the study revealed that both cell organelle overload and receptors  
116 involved in the recognition of viral RNA may team up to induce proinflammatory cytokines.  
117 This mechanism can be exploited to develop new treatments for COVID-19 disease.

118

## 119 **Introduction**

120

121 Coronavirus disease 2019 (COVID-19) is a pandemic infection produced by severe acute  
122 respiratory syndrome coronavirus 2 (SARS-CoV-2). Habitual evolution includes an initial  
123 influenza-like phase where fever and unproductive cough are predominant, but it can lead to  
124 severe respiratory insufficiency and multiorgan failure, which in many cases proceeds after  
125 infection resolution due to a hyperinflammatory response associated with the production of  
126 proinflammatory cytokines. The term cytokine storm was coined to refer to this condition [1],  
127 but the analysis of the immunopathological damage and the analogies with other viral diseases  
128 make it most appropriate the use of viral sepsis to depict the association of T-cell deficiencies  
129 with systemic hyperinflammation driven by virus-host cell interaction [2]. The use by viruses  
130 of the translational machinery of the host to produce their materials overloads many cellular  
131 functions, including protein folding and secretion in the endoplasmic reticulum (ER). Since  
132 only properly folded proteins should exit from the ER to maintain homeostasis, cells arrange a  
133 response directed to retain and degrade defective proteins. This involves an intracellular  
134 signaling pathway termed the unfolded protein response (UPR) [3-5]. The UPR includes a  
135 down regulation of global protein synthesis, the degradation of some proteins, and the  
136 transcriptional induction of specific genes associated with the activity of its three branches.  
137 The most conserved one depends on the dual activity of inositol-requiring enzyme 1 $\alpha$  (IRE1 $\alpha$ ),  
138 which shows protein kinase and endonuclease activities [6]. The endonuclease activity cleaves  
139 a 26- base fragment of the mRNA of the preformed transcript of *XBPI*, which is followed by  
140 ligation of the resulting exons to yield *sXBPI*. This drives the translation of the functionally  
141 active factor *sXBPI* that *trans*-activates genes encoding proinflammatory proteins, e.g., the  
142 prostaglandin producing enzymes cyclooxygenase 2 and the microsomal isoform of

143 prostaglandin synthase 2 [7], the ubiquitin-like modifier ISG15, and the cytokines IFN $\beta$ , IL-6,  
144 IL-23, and TNF $\alpha$  [8-11].

145 Although the goal of the UPR is alleviating ER-stress, the IRE1 $\alpha$ -XBP1 branch  
146 contributes to the pathogenesis of multiple ailments, including cancer, atherosclerosis,  
147 infections, and autoimmune diseases [12-15]. Recent research has disclosed that the IRE1 $\alpha$ -  
148 XBP1 branch enhances viral transcription and contributes to maintain dormant viral genomes  
149 in a host of infections [16,17]. The notion that UPR branches can mediate immune recognition  
150 of zoonotic viruses and drive acute lung injury through ER-stress mediated inflammation was  
151 disclosed by Hrincius et al. [18], who showed activation of the UPR by infection with poorly  
152 glycosylated pandemic strains of influenza A virus. The IRE1 $\alpha$  route was recruited, and its  
153 activation reduced when glycans were added to specific sites in the globular head of  
154 hemagglutinin. A study in cell lines infected with a SARS-CoV-2 isolate and lung biopsies of  
155 COVID-19 patients showed that SARS-CoV-2 hijacks the glycosylation biosynthetic  
156 machinery and drives ER-stress and UPR activation. This is due to the overwhelming  
157 asparagine N-linked glycosylation required for the translation of viral glycoproteins, which  
158 forces aberrant glycosylation and ER-stress [19]. In keeping with notion, specific activation of  
159 sXBP1 has been reported in monocytes from COVID-19 patients [20].

160 The association of sXBP1 with TLR2 and TLR4 signaling [8] together with genuine  
161 UPR induced by protein synthesis overload point to sXBP1 involvement in the cytokine storm.  
162 [21]. The role of cytokine storm in COVID-19 disease was supported by the beneficial effect  
163 of tocilizumab, a humanized antihuman IL-6 receptor antibody [22]. This is noteworthy given  
164 the dependence of IL-6 production on the IRE1 $\alpha$ -XBP1 branch [8] and the presence in the  
165 proximal promoter of *IL6* of at least six sequences binding to sXBP1 [23]. Another potential  
166 interference of sXBP1 on COVID-19 illness stems from its blunting effect on dendritic cell  
167 homeostasis and the metabolic fitness of T-cells [24,25]. Likewise, the  $\sigma$ 1 receptor (S1R)

168 reduces cytokine production in murine models of septic shock through IRE1 $\alpha$  endonuclease  
169 activity inhibition [14]. A new piece of evidence associating the UPR with COVID-19 illness  
170 was the induction of the UPR by ORF8 and S viral proteins, as well as the reduction of viral  
171 replication by pharmacological inhibition of the IRE1 $\alpha$  and ATF6 branches in epithelial cell  
172 lines [26]. In contrast, up-regulation of IRE1 $\alpha$  (RNase) activity by cannabidiol has been found  
173 to block SARS-CoV-2 replication in a cell line derived from lung epithelial cells and in lungs  
174 and nasal turbinates of infected mice [27].

175         Given that SARS-CoV-2 is a +ssRNA virus, the tandem TLR7/8 comes into  
176 prominence given its ability to bind viral RNA. Consistent with this notion, loss-of-function  
177 variants in X-chromosomal *TLR7* have been reported in young patients with severe COVID-  
178 19 disease, who showed impaired type I and II IFN responses [28]. The purpose of this study  
179 has been addressing how sXBP1 and TLR7/8 engagement may underpin viral sepsis in  
180 COVID-19 disease. To this end, samples of nasopharyngeal swabs and bronchoalveolar  
181 aspirates (BAAs) were studied to address the presence of *sXBP1*, the cytokine-signature, and  
182 the expression of monocytic lineage cell markers and enzymes involved in energetic  
183 metabolism. After obtaining a profile of the transcriptional landscape, *in vitro* experiments  
184 were performed to address the transcriptional and energetic patterns of MDDCs stimulated with  
185 TLR7 and TLR8 agonists. Experiments showed that TLR8 activation of MDDCs induces a  
186 pattern of *XBPI* splicing and cytokine expression, sensitive to inhibition of IRE1 $\alpha$  RNase  
187 activity, which mimics the pattern observed in BAAs.

188

## 189 **Results**

190

### 191 **Studies in Nasopharyngeal Samples**

192 Initial assays were conducted in nasopharyngeal samples from patients receiving medical  
193 assistance for symptoms consistent with COVID-19 disease (Fig 1A). The extracted RNA was  
194 used for the diagnosis of SARS-CoV-2 infection and residual samples used for the assay of  
195 *sXBPI* by RT-PCR assays. This entails the separation of the PCR products by electrophoresis  
196 in agarose gel and densitometric analysis of GelRed stained bands. *sXBPI* is distinguished  
197 from unspliced *XBPI* (*uXBPI*) by its faster migration. The position of the primers and the  
198 spliced region are shown in Fig 1B. These correspond to GenBank sequence  
199 NM\_001079539.2, which differs from *uXBPI* sequence NM\_005080.4 by the deletion of 26  
200 nucleotides. Separate sequencing of the bands was used to confirm splicing (Fig 1C). A  
201 random selected array of RT-PCR negative and positive samples shows the presence of *uXBPI*  
202 and *sXBPI* (Fig 1D). The presence of three bands in some cases is explained by the formation  
203 of heteroduplexes [29]. *sXBPI* was detected in 17.91% of SARS-CoV-2 negative and 40.32%  
204 of SARS-CoV-2 positive patients (Fig 1E). Quantitation of *sXBPI* showed higher values in  
205 COVID-19 positive patients as compared to the negative ones (Fig 1F). The incidence of  
206 *sXBPI* was similar in male and females (Fig 1G) and increased with age (Fig 1H). Mortality  
207 was observed in four patients who showed a degree of splicing above 10% of total *XBPI* (Fig  
208 1I). These findings show that *sXBPI* shows higher frequency and extent in nasopharyngeal  
209 exudates of patients with active SARS-CoV-2 infection, particularly in dying patients.

210

### 211 ***sXBPI* and Cytokine Expression in BAAs**

212 Further experiments were carried out using RNA extracted from BAAs of patients under  
213 mechanical ventilation in intensive care unit (ICU) (Fig. 2A). Ventilatory support and

214 endotracheal intubation were indicated because of acute hypoxemic respiratory failure despite  
215 high-flow nasal oxygen therapy or non-invasive ventilation. COVID-19 patients received a  
216 standard and proved useful treatment for the hyperinflammatory state consisting of 6 mg  
217 dexamethasone daily or 50 mg of IV hydrocortisone every 8 hours for up to 10 days, while this  
218 protocol was not routinely used in non-COVID-19 patients (Fig 2B). The extent of *sXBP1* was  
219 higher in SARS2-CoV-2 pneumonia patients than in those with respiratory failure due to other  
220 conditions, decreased after COVID-19 tests turned negative, and showed higher values than  
221 those observed in nasopharyngeal swabs (Fig 2C). The PERK-eIF2 $\alpha$ -ATF4-CHOP branch of  
222 the UPR was explored assaying *DDIT3/CHOP* gene expression. *DDIT3* expression also  
223 decreased after SARS-CoV-2 tests turned negative, while there was no significant difference  
224 of expression between non-COVID-19 and COVID-19 pneumonia patients (Fig 2D). As  
225 regards cytokine expression (Fig 2E-2N), *IL1B* and *IL6* mRNA levels during viral proliferation  
226 were significantly lower than those detected in non-COVID-19 patients. A similar trend was  
227 observed in *TNF*, *IL23A*, and *IL8* mRNA expression, although these values did not reach  
228 statistical significance. Cytokine mRNA did not show a trend to decrease after SARS-CoV-2  
229 tests were negative. *IL10* and *IFNB* mRNA were higher in SARS-CoV-2 infection than in non-  
230 COVID pneumonia and continued elevated after COVID-19 tests turned negative. *IFNG*  
231 showed a trend to be increased in COVID-19 pneumonia. Overall, these results show that  
232 *sXBP1* in respiratory samples from COVID-19 patients does not associate with levels of  
233 cytokine expression higher than those observed in non-COVID-19 pneumonias. The high  
234 expression of *IL10* mRNA suggests a parallel activation of an archetypal anti-inflammatory  
235 cytokine that might counter the inflammatory response. The increased expression of *IFNBI*  
236 mRNA is consistent with its involvement in viral sepsis.

237

238 ***sXBP1* Stratification in SARS-CoV-2 Patients during ICU Hospitalization**



239 SARS-CoV-2 patients were stratified according to the presence or absence of both active  
240 infection and *sXBP1*. Fig 3A shows viral load in samples collected during infection and at the  
241 time when a negative COVID-19 test was first recorded. *PTGS2* mRNA was higher in patients  
242 with *sXBP1* both during infection and after negativization of the RT-PCR test (Fig 3B). *TNF*  
243 and *IL1B* mRNA expression was also higher in patients with *sXBP1*, even after a negative RT-  
244 PCR test (Fig 3C and 3D). *IL6* mRNA was increased in patients with *sXBP1* and active  
245 infection (Fig 3E). *IL8* mRNA was expressed at much lower levels than those encoding other  
246 cytokines, particularly after negativization of the infection in patients who did not show *sXBP1*  
247 (Fig 3F). *IL10* mRNA was higher in SARS-CoV-2 positive patients who did not show *sXBP1*  
248 and remained elevated in patients showing *sXBP1* after resolution of the infection. These  
249 results show a high expression of the mRNA of *PTGS2* and several proinflammatory cytokines  
250 in patients with *sXBP1*, which may persist after SARS-CoV-2 test becomes negative. The  
251 sustained expression of *PTGS2* (COX2) mRNA suggests its involvement in either induction or  
252 repair of inflammatory damage [30]. Together, the results agree with the reported role of  
253 *sXBP1* in the transcriptional activation of COX2, TNF $\alpha$ , IL-1 $\beta$ , and IL-6.

254

### 255 **Expression of Genes Involved in Glycolysis and Oxidative Phosphorylation (OXPHOS)**

256 Lymphocytes and myeloid cells respond to pathogen-associated molecular patterns (PAMPs)  
257 with a robust rewiring of their energetic metabolism driving increased glycolysis (Fig 4A). The  
258 impairment of O<sub>2</sub> supply due to pneumonia further explains the resort to glycolysis and agrees  
259 with reports showing that SARS-CoV-2-induced metabolic reprogramming enhances the  
260 production of proinflammatory cytokines and IFNs by monocytes, and concomitantly inhibits  
261 T cell function [31,32]. Consistent with this notion, the expression of *GLUT1* mRNA, a glucose  
262 transporter, and *HIF1A* mRNA, a transcription factor involved in the regulation of glycolytic  
263 enzymes, were increased during active infection. However, there was no difference as

264 compared to non-COVID-19 pneumonia (Fig 4B and 4C). The mRNA encoding hexokinase II  
265 (Fig 4D), pyruvate dehydrogenase kinase IV (Fig 4F), malate dehydrogenase (MD) 2 (Fig 4G),  
266 and *cis*-aconitate dehydrogenase (*IRG1* gene) (Fig 4K) increased during active infection as  
267 compared to both non-COVID-19 pneumonia and post-COVID infection. Notably, proteins  
268 involved in mitochondrial function also increased during COVID-19 pneumonia, i.e., succinate  
269 dehydrogenase subunit A (Fig 4I) and the 2-oxoglutarate-malate transporter SLC25A11, (Fig  
270 4J). Together, these data show a resort to glycolysis during active SARS-CoV-2 infection that  
271 seems supported by the activity of HIF1 and elements of the malate-aspartate shuttle such as  
272 MD2 and SLC25A11, which buttress the NAD<sup>+</sup>/NADH redox balance necessary for the  
273 progression of glycolysis at the glyceraldehyde 3-phosphate-dehydrogenase step.

274

#### 275 **Characterization of Monocytic Markers in BAAs**

276 The first attempt to characterize the monocytic/macrophagic populations in BAAs focused on  
277 the expression of TLR7/8, given their involvement in the recognition of viral RNA. *TLR8*  
278 mRNA was expressed to a far greater extent than *TLR7* mRNA (Fig 5A), which agrees with  
279 the decay of *TLR7* expression during the differentiation to MDDCs [33]. Further assay of  
280 markers showed a diminished expression of *HLA-DRB1* (Fig 5B), a gene involved in antigen  
281 presentation, *CD300E* (Fig 5C), a gene associated with survival signals, the chemokine  
282 receptor *CCR2* (Fig 5D), and the IFN-stimulated gene (ISG) *MX1*, (Fig 5G). Negativization of  
283 viral replication was associated with an increase of the expression of these genes, as well as  
284 the migration receptor *MMP9* (Fig 5E) and the MDDC differentiation marker *BATF3* (Fig 5F).  
285 *PTGS2/COX2* mRNA was similar in non-COVID and active COVID infection and decreased  
286 after RT-PCR test became negative (Fig 5I). The mRNA of the ISG *OAS1* did not show  
287 significant changes during SARS-CoV-2 infection and increased after negativization of SARS-  
288 CoV-2 test (Fig 5H). *TMPRSS2* mRNA, a serine protease involved in the cleavage of viral

289 spike proteins [34] was significantly increased during SARS-CoV-2 active infection and (Fig  
290 5J). These results disclose a differentiation profile during COVID-19 infection characterized  
291 by a low expression of markers associated with antigen presentation and survival signals, as  
292 well as *MXI*. This is followed by an increase of the markers expressed in MDDCs in response  
293 to TLR ligands [33]. The high expression of *TMPRSS2* mRNA underscores the role of  
294 *TMPRSS2* in SARS-CoV-2 cell invasion and the low expression of *MXI* agrees with the  
295 reported association of single nucleotide polymorphisms within *TMPRSS2* and near *MXI* gene  
296 with severe COVID-19 disease [35]. A cogent explanation for the low *MXI* expression could  
297 be an evasive strategy of SARS-CoV-2 to avoid and/or shut down type I IFN responses [36].

298

### 299 **Effects Induced by the Stimulation of Receptors Involved in the Recognition of Viral** 300 **RNAs in MDDCs**

301 Because SARS-CoV-2 is a +ssRNA virus, we posited that TLR7/8 might shape the innate  
302 immune response, given their endosomal location and accessibility to intracellular viral RNA.  
303 *TLR7* and *TLR8* expression in MDDCs mimicked the pattern observed in BAAs by showing a  
304 high expression of *TLR8* and a low expression of *TLR7* mRNA (Fig 6A). Activation of TLR7  
305 by the selective ligand imiquimod showed a low extent of *XBPI* splicing, even in real-time  
306 RT-PCR assays using a reverse primer overlapping the spliced region (Fig 6B). Consistent with  
307 the effect of palmitate as a potentiator of imiquimod effect via metabolic rewiring and *XBPI*  
308 splicing [11], the expression of proinflammatory cytokines increased in the presence of  
309 palmitate (Fig 6C-6F). In contrast, 2-deoxyglucose, which enhances *XBPI* splicing in the  
310 presence of some PAMPs [10] showed a limited effect. Given that IFN $\gamma$  teams up with TNF $\alpha$   
311 to induce mortality in mice during SARS-CoV-2 infection [37] and it has been associated with  
312 the development of cytokine storm [38-41], the expression of ISGs was assayed. In contrast to  
313 IFNs, *MXI* and *OAS1* showed high levels of expression. The IRE1 $\alpha$  RNase inhibitor MKC8866

314 [42] and the S1R agonist fluvoxamine, which has been reported to inhibit *XBPI* splicing in  
315 bacterial sepsis [14], lacked any significant effect on those responses (Fig 6G-6J). Real-time  
316 assays of energetic metabolism with the Seahorse technology, showed a reduction of O<sub>2</sub>  
317 consumption rate (OCR) and an increased extracellular acidification rate (ECAR) in response  
318 to imiquimod (Fig 6K), thus mimicking the glycolytic rewiring induced by bacterial PAMPs  
319 [43]. These effects were enhanced by metformin, a well-known inhibitor of the complex I of  
320 the electron transport chain (Fig 6L) that has been associated with a beneficial effect on the  
321 evolution of COVID-19 disease [44], most likely explained by its ability to reduce IL-1 $\beta$  and  
322 enhance IL-10 production [45]. Poly(cytidylic-inosinic) acid (poly(I:C)), a polyribonucleotide  
323 that mimics the effects of viral double-stranded RNA and activates TLR3, did not show any  
324 significant effect (Fig 6M).

325 In contrast to the limited effect of imiquimod, the TLR8 agonist ssRNA40, a 20-mer  
326 phosphorothioate protected single-stranded RNA oligonucleotide containing a GU-rich  
327 sequence, induced *sXBPI* in a similar way to the effect of the TLR2 agonist zymosan. The  
328 splicing was blocked by the IRE1 $\alpha$  RNase inhibitors MKC8866 and 4 $\mu$ 8C (Fig 7A). MKC8866  
329 also inhibited the expression of *IL1B*, *IL6*, and *TNF* mRNA (Figs 7B-7D) and protein (Fig 7E-  
330 7F), thus resembling the cytokine signature detected in BAAs. ssRNA41, a ssRNA40  
331 derivative wherein uracil nucleotides are replaced with adenosine and does not activate TLR8-  
332 dependent signaling, did not induce cytokine expression, induced *sXBPI* to a low extent, and  
333 was less active than ssRNA40 to induce the aggregation of misfolded proteins, as deemed from  
334 the assay of aggresomes (S1A and S1B Fig). While pro-IL-1 $\beta$  expression increased in response  
335 to ssRNA40 (Fig 7G), IL-1 $\beta$  was not detected in MDDCs supernatants, thus suggesting that  
336 ssRNA40 does not activate the inflammasome and that an additional signal(s) is required for  
337 IL-1 $\beta$  secretion. The expression of IL-6 and TNF $\alpha$  protein was inhibited by both MKC8866  
338 and fluvoxamine, which suggests that *sXBPI* plays a significant role on the transcription of

339 these cytokines. *IFNB1*, *MX1*, and *OAS1* mRNA were also induced by ssRNA40, while both  
340 MKC8866 and fluvoxamine only inhibited *MX1* and *OAS1* expression (Fig 7H-7K), thus  
341 suggesting a direct effect of sXBP1 on *MX1* and *OAS1* expression, rather than an indirect effect  
342 mediated by IFNs. Notably, ssRNA40 did not modify the energetic pattern of MDDCs (S1C  
343 Fig), which indicates that its ability to induce cytokine expression does not depend on blatant  
344 energetic changes. Unlike ssRNA40, zymosan, a ligand of TLR2 and C-type lectin receptors  
345 that mimics the external wall of fungi, induced a robust induction of glycolysis and OXPHOS  
346 as deemed from ECAR and OCR increases, respectively (S1D Fig).

347 To confirm the involvement of sXBP1 in the transcriptional activation of cytokines, its  
348 binding to the proximal promoter regions of *IL1B*, *IL6*, and *TNF* was assayed. Chromatin  
349 immunoprecipitation (ChIP) assays were conducted with primers spanning areas including  
350 consensus *cis*-regulatory elements associated with position weight matrices discovered in  
351 sXBP1 target promoters [23]. An increased binding of sXBP1 to the regions indicated in Fig  
352 7L-N was observed after one hour of stimulation by ssRNA40. These results show that PAMPs  
353 acting on TLR8 induce a cytokine signature like that observed in BAAs and point to the central  
354 involvement of MDDCs in the innate immune response to SARS-CoV-2. The presence of  
355 *sXBP1* in nasopharyngeal swabs and BAAs, its induction by ssRNA40 in MDDCs, the effect  
356 of IRE1 $\alpha$  RNase inhibition on the cytokine induction produced by ssRNA40, and the  
357 demonstration of sXBP1 binding to the *IL1B*, *IL6*, and *TNF* promoters suggest that TLR8-  
358 induced *XBPI* splicing may contribute to the viral sepsis observed in severe cases of COVID-  
359 19 disease.

## 360 **Discussion**

361

362 Current pathogenetic views on COVID-19 pneumonia focus on immunopathological damage  
363 due to an exuberant innate immune response and a poor adaptive response. Assay of respiratory  
364 secretions allows the identification of the pathogens and can also give cues on pathogenesis  
365 [46-48]. This approach has been used in COVID-19 disease after the seminal studies by Zhou  
366 et al. [49] and Liao et al. [50], who used bronchoscopy and lavage to identify immune cell  
367 types in the respiratory tract. Our study focussed on patients under mechanical ventilatory  
368 support due to severe pneumonia, whose samples were obtained during routine care by  
369 attending staff [51-53]. This is in line with the use of tracheal aspirates to assess the  
370 transcriptional profiling of the lower respiratory tract in critically ill COVID-19 patients [54].  
371 Initial assays showed higher degrees of *sXBP1* in COVID-19 disease than in patients with non-  
372 SARS-CoV-2 infection, although the mRNA levels of proinflammatory cytokines were higher  
373 in patients undergoing bacterial pneumonia. This was not fully unexpected, since cytokine  
374 storm is influenced by genetics and physiological conditions, in addition to cytokine levels  
375 [55,56]. Moreover, COVID-19 patients received steroids in a regular schedule, which  
376 contributes to reduce proinflammatory cytokines, and showed an overall mortality lower than  
377 that observed in non-COVID patients. Notably, inhibition of IRE1 $\alpha$  activity through activation  
378 of SIR by fluvoxamine protected mice from mortality during endotoxemia and fecal-induced  
379 peritonitis, as well as the production of IL-1 $\beta$ , IL-6, and IL-12 p40 by human leukocytes [14].  
380 Consistent with the experimental results, early fluvoxamine treatment in individuals with mild  
381 COVID-19 illness was associated with a reduction of signs of clinical deterioration as  
382 compared to the placebo group [57]. Similar results were reported in the TOGETHER trial,  
383 which involved larger cohorts for study and showed a significant reduction of morbidity by  
384 fluvoxamine, as deemed from a reduced resort to either retention in a COVID-19 emergency

385 setting or transfer to tertiary hospital. Consistent with these findings, an independent data safety  
386 monitoring committee recommended stopping randomly assigning patients to the fluvoxamine  
387 arm in view of the superiority criterion for the primary endpoint [58]. Stratification of patients  
388 showing active infection and *sXBPI* disclosed the association of *sXBPI* with higher levels of  
389 cytokine expression and their decrease after infection negativization, thus suggesting that the  
390 effect of fluvoxamine may be due to inhibition of the IRE1 $\alpha$ -XBP1 branch.

391         Secondary goals of the study were the characterization of enzymes involved in the  
392 bioenergetics and the identification of myeloid-lineage differentiation footprints. Bioenergetic  
393 screening suggested active glycolysis during SARS-CoV-2 infection supported by HIF1 and  
394 elements of the malate-aspartate shuttle. However, the predominance of glycolytic enzymes  
395 cannot be straightforwardly construed as a proof of aerobic glycolysis or Warburg effect given  
396 the compromise of O<sub>2</sub> supply associated with SARS-CoV-2 pneumonia. The strong induction  
397 of *IRGI/ACOD1* mRNA is consistent with its dependence on IFNs [59,60]. Notably, the  
398 ACOD1 product itaconate exerts antiviral activity and is considered a druggable target to  
399 counter the hyperinflammatory response [61].

400         Monocytic lineage cells are key players of the innate immune response due to their  
401 array of pattern recognition receptors and involvement in antigen presentation. BAAs showed  
402 a low expression of markers associated with antigen presentation, survival signals, and the ISG  
403 *MXI* during active infection. It is remarkable the low expression of *HLA-DRB1* mRNA, the  
404 gene encoding the most prevalent  $\beta$ -subunit of HLA-DR. This is in accordance with the  
405 decreased expression of HLA-DR in monocytes of COVID-19 patients, which drives  
406 hyperinflammation and defective antigen presentation mediated by IL-6 [62]. In contrast, the  
407 increased expression of *TMPRSS2* mRNA agrees with the facilitating role of this  
408 transmembrane protease in viral infection by cleaving viral S glycoprotein. Tellingly, single

409 nucleotide polymorphisms at 21q22.3 locus within *TMPRSS2* and near *MX1* genes have been  
410 associated with severe COVID-19 disease [35].

411 TLR7 and TLR8 are tandem duplicated genes on the X-chromosome, the function of  
412 which shows some commonalities and specificities. For instance, TLR8 is not functional in  
413 mice, and this explains the involvement of TLR7-induced cytokines in murine influenza [63].  
414 TLR8 expression is a hallmark of human MDDCs, while TLR7 is present in monocytes,  
415 macrophages, and plasmacytoid dendritic cells [33]. A pioneering study addressing the  
416 pathophysiology of 2003 SARS-CoV-1 outbreak showed a unique ability of SARS-CoV-1 GU-  
417 rich RNA sequences to induce proinflammatory cytokines through TLR7 in mice and TLR8 in  
418 human leukocytes [64]. This notion was extended in a recent report by comparing the effect of  
419 GU-rich RNAs on inflammasome activation and proinflammatory cytokine production.  
420 Notably, GU-rich RNA from the SARS-CoV-2 spike protein triggered the greatest  
421 inflammatory in human macrophages via TLR8 [65]. This agrees with our BAA and *in vitro*  
422 studies showing TLR8 as a central element in the recognition of +ssRNA virus and suggests a  
423 unique involvement of MDDCs and TLR8 in *XBPI* splicing and hyperinflammation.  
424 Comparison of ssRNA40 and ssRNA41 effects show that TLR8-dependent signaling and  
425 sXBP1 are critical for cytokine expression, given the lack of effect of ssRNA41.

426 Activation of TLR7 by imiquimod induced a limited set of MDDC responses. However,  
427 it was remarkable the effect on energetic metabolism, characterized by a drop of the OCR and  
428 a parallel increase of ECAR, which mimicked the well-known effect of bacterial  
429 lipopolysaccharide. The effect on cytokines and *sXBP1* was negligible and only reached  
430 significant values in the presence of palmitate. Unfortunately, our study does not contribute to  
431 answer open questions regarding the actual role of TLR7 in SARS-CoV-2 defense and  
432 immunopathology. TLR7 mutations driving loss-of-function in the antiviral response have  
433 been associated with severe forms of COVID-19 disease in young male [28]. Another study



434 showed that while some TLR7 variants exhibit a robust loss-of-function on type I IFNs  
435 production, other variants only have a marginal effect, thus suggesting that TLR7 may shape  
436 the anti-viral response through additional mechanisms [66]. Moreover, autosomal inborn errors  
437 of TLR3- and IRF7-dependent type I IFN immunity were found in 23 out of 659 patients with  
438 severe COVID-19 pneumonia [67], thus stressing the role of type I IFNs in the protection  
439 against severe forms of COVID-19 pneumonia. Our data agree with Ito et al. [68] findings,  
440 who first disclosed that the TLR7/TLR8 agonist R848 was 100-fold as potent as imiquimod in  
441 human MDDCs. The absence of energetic rewiring induced by ssRNA40 could be explained  
442 by IFN $\beta$  effect, since IFN $\beta$  restrains aerobic glycolysis during mycobacteria infection. This  
443 drives mitochondrial stress and helps explain why type I IFN may cause damaging effects to  
444 the host [69]. Consistent with this interpretation is the lack of effect of poly(I:C), a selective  
445 activator of TLR3 that by using TRIF as the sole adaptor, activates IRF3 and ultimately induces  
446 type I IFNs. This is in sharp contrast with the effect of zymosan, a ligand for TLR2 and the C-  
447 type lectin receptor dectin-1 [70]. The binding of sXBP1 to *IL1B*, *IL6*, and *TNF* promoters  
448 induced by ssRNA40, together with the strong reduction of cytokine expression by an inhibitor  
449 of IRE1 $\alpha$  RNase, further indicates that the IRE1 $\alpha$ -XBP1 branch underpins the production of  
450 cytokines via TLR8. These results assign to TLR8 capacities previously reported for TLR2 and  
451 TLR4, where sXBP1 is required for sustained production of proinflammatory cytokines. A  
452 corollary to these results is that inhibition of IRE1 $\alpha$  RNase activity could be a therapeutic  
453 approach for severe COVID-19 disease.

454

## 455 **Materials and Methods**

456

### 457 **Patients, Leukocyte Samples, and Ethic Statements**

458 Nasopharyngeal samples were obtained from patients studied in different medical departments  
459 for symptoms consistent with SARS-CoV-2 infection at *Hospital Clínico Universitario de*  
460 *Valladolid*. In the case of patients with mechanical ventilation and intubation, samples were  
461 obtained by endotracheal aspirations to remove respiratory secretions as part of clinical care  
462 by the attending staff. This allows the obtention of material from the alveolar and respiratory  
463 bronchiole level. BAAs were directly transferred to the DNA/RNA extraction kit MagMAX™  
464 Pathogen RNA/DNA (Applied Biosystems) for the automated extraction machine Kingfisher  
465 Flex (Thermo Fisher Scientific). Infection diagnosis was obtained using a TaqPath™ COVID-  
466 19 RT-PCR kit assay from Applied Biosystems that targets N, ORF1a, and S genes. Resolution  
467 of infection was confirmed by the analysis of samples collected four days after a positive test.  
468 BAAs from non-COVID-19-patients were obtained from samples collected for microbiological  
469 diagnosis in patients suffering from severe bacterial pneumonia and requiring ventilatory  
470 support and intubation at ICU. Lung protective ventilation of both COVID-19 and non-  
471 COVID-19 patients was performed according to the current guidelines on mechanical  
472 ventilation of acute respiratory distress syndrome in adult patients, which makes it unlike the  
473 induction of cytokine expression by mechanical ventilation [71]. The clinical part of the study  
474 was approved by the Ethics Committee of *Area de Salud Valladolid Este* (ref. PI-GR-20-2011  
475 COVID). For *in vitro* experiments, MDDCs were obtained from human mononuclear cells  
476 collected from pooled buffy coats of healthy donors provided by *Centro de Hemoterapia y*  
477 *Hemodonación de Castilla y León Biobank*. The study was approved by the Bioethical  
478 Committee of the Spanish Council of Research (CSIC) and the written informed consent of all  
479 healthy donors was obtained at *Centro de Hemoterapia y Hemodonación de Castilla y León*

480 *Biobank*. The researchers received the samples in an anonymous way. The process is  
481 documented by the Biobank authority according to the specific Spanish regulations. The ethics  
482 committee approved this procedure before starting the study. The differentiation of monocytes  
483 was carried out in the presence of GM-CSF and IL-4 for 5 days. Culture was carried out in  
484 RPMI 1640 medium containing 11.1 mM D-glucose and 4 mM L-glutamine. 10% FBS was  
485 maintained during the differentiation process and reduced to 2% at the start of experiments.  
486 Imiquimod (Sigma-Aldrich), ssRNA40/LyoVec™, and its negative control  
487 ssRNA41/LyoVec™ (InvivoGen) were used as TLR7 and TLR8 selective ligands in MDDCs.  
488 MKC8866 was from MedChemExpress.

489

#### 490 ***XBPI* Splicing Assay**

491 This was carried out by RT-PCRs using primers outside the spliced region. The PCR conditions  
492 were 5 min at 95°C (hot start), 45 cycles of denaturation at 95°C for 15 s, annealing at 60°C  
493 for 20 s and elongation at 72°C for 1 min. Final extension was carried out at 72°C for 5 min.  
494 Gel electrophoresis was carried out in 3% agarose and *sXBPI* and *uXBPI* bands were  
495 visualized by GelRed® staining and quantified using GelDoc Go Image System (Bio-Rad).

496

#### 497 **Real-Time RT-PCR and Protein Assays**

498 Total RNA obtained by automatic extraction was used for RT reactions. The resulting cDNA  
499 was amplified in a LightCycler® 480 equipment using SYBR Green I mix containing Hot Start  
500 polymerase. Cycling conditions were adapted to each set of primers. *ACTB* was used as a  
501 housekeeping gene to assess the relative abundance of the different mRNA using the  
502 comparative cycle threshold method. The procedure was used to assay *XBPI*, *DDIT3*, *IL1B*,  
503 *IL6*, *IL10*, *IL23A*, *TNF*, *SLC25A11*, *GLUT1*, *HK2*, *PFKB3*, *PDK4*, *IDH1*, *IDH2*, *SDHA*,  
504 *MDH2*, *HIF1A*, *TLR7*, *TLR8*, *HLA-DRB1*, *CD300E*, *CCR2*, *MMP9*, *BATF3*, *MX1*, *OAS1*,

505 *PTGS2*, and *TMPRSS2* mRNA. Primer sequences are shown in Table 1. IL-6 and TNF $\alpha$   
506 proteins were assayed in supernatants of MDDCs stimulated with ssRNA40 using kits from  
507 Elabscience. Pro-IL-1B was assayed by Western blot using an antibody from Cell Signaling  
508 Technology.

509

510

**Table 1. Sequences of primers used for qRT-PCR and ChIP assays**

| <b>GENE</b>                | <b>Forward primer</b>           | <b>Reverse primer</b>           |
|----------------------------|---------------------------------|---------------------------------|
| <i>XBP1</i>                | 5'- TGAGCTGGAACAGCAAGTGG -3'    | 5'- ATACCGCCAGAAATCCATGGGGA -3' |
| <i>sXBP1</i>               | 5'- TGAGCTGGAACAGCAAGTGC -3'    | 5'- CTGCACCTGCTGCGGACTCA -3'    |
| <i>DDIT3</i>               | 5'- GCAGAGATGGCAGCTGAGTC -3'    | 5'- AGCCAAGCCAGAGAAGCAGGGT -3'  |
| <i>IL1B</i>                | 5'- ATGATGGCTTATTACAGTGGCAA -3' | 5'- GTCGGAGATTCGTAGCTGGA -3'    |
| <i>TNF</i>                 | 5'-GTTGTAGCAAACCTCAAGC-3'       | 5'-TTGAAGAGGACCTGGGAGTA-3'      |
| <i>IL6</i>                 | 5'- TTCGGTACATCCTCGACGGC -3'    | 5'- TCTGCCAGTGCCTCTTTGCT -3'    |
| <i>IL8</i>                 | 5'- ATTTCTGCAGCTCTGTGTGAA -3'   | 5'- AACTTCTCCCAGCTCTTAAGT -3'   |
| <i>IL10</i>                | 5'-GAGAACAGCTGCACC CAC TT-3'    | 5'-GGCCTTGCTCTTGT TTACAC-3'     |
| <i>IL23A</i>               | 5'- GTTCCCCATATCCAGTGTGG -3'    | 5'- TTAGGGACTCAGGGTTGCTG -3'    |
| <i>IL12B</i>               | 5'- CATGGGCCTTCATGCTATTT -3'    | 5'- TTTGCATTGTCAGGTTTCCA -3'    |
| <i>IFNB1</i>               | 5'- TCTAGCACTGGCTGGAATGAG -3'   | 5'- GTTTCGGAGGTAACCTGTAAG-3'    |
| <i>IFNG</i>                | 5'-CCAACGCAAAGCAATACATGA-3'     | 5'-CCTTTTTTCGCTTCCCTGTTTTA-3'   |
| <i>N Gene</i>              | 5'- CAATGCTGCAATCGTGTAC -3'     | 5'- GTTGCAGTACGTGATGAGG -3'     |
| <i>COX2</i>                | 5'- TTCAAATGAGATTGTGGGAA -3'    | 5'- AGATCATCTCTGCCTGAGTA -3'    |
| <i>GLUT1</i>               | 5'- GAAGAGAGTCGGCAGATGAT -3'    | 5'- AATAGAAGACAGCGTTGATGC -3'   |
| <i>HIF1A</i>               | 5'-AGTGTACCCTAACTAGCCGA-3'      | 5'-GTGCAGTGCAATACCTTCC-3'       |
| <i>HK2</i>                 | 5'- TAGGGCTTGAGAGCACCTGT -3'    | 5'- CCACCCCACTGTCACCTTTG -3'    |
| <i>PFKFB3</i>              | 5'-CCGTTGGAACTGACGCAGA -3'      | 5'-CACAGGATCTGGGCAACGAG-3'      |
| <i>PDK4</i>                | 5'- CCCGCTGTCCATGAAGCAGC -3'    | 5'-CCAATGTGGCTTGGGTTTCC-3'      |
| <i>MDH2</i>                | 5'- TCGGCCAGAACAAATGCTAAA -3'   | 5'- GCGGCTTTGGTCTCGATGT -3'     |
| <i>IDH2</i>                | 5'- TGGCTCAGTCTCAAGTCT -3'      | 5'- CTCAGCCTCAATCGTCTTCC -3'    |
| <i>SDHA</i>                | 5'- CAGCATGTGTTACCAAGCT -3'     | 5'-GGTGTCTAGAAATGCCAC -3'       |
| <i>SLC25A11</i>            | 5'- ACACCGTCTCACCTTCATC -3'     | 5'- CAGGGGGTAGAACAGACCAA -3'    |
| <i>IRG1</i>                | 5'- GTTCCTGGGAACCACTACG -3'     | 5'- GATGTCTGGCTGACCCCAA -3'     |
| <i>TLR7</i>                | 5'-CTTGGCACCTCTCATGCTCT-3'      | 5'-GTCTGTGCAGTCCACGATCA-3'      |
| <i>TLR8</i>                | 5'-GCTGACCTGCATTTTCCTGC-3'      | 5'-CCGTTTGGGGAACCTCCTGT-3'      |
| <i>HLA-DRB1</i>            | 5'-TTCCTGTGGCAGCCTAAGAG-3'      | 5'-AACCCCGTAGTTGTGTCTGC-3'      |
| <i>CD300E</i>              | 5'-AGAGAAGGTGGAGAGGAATGG-3'     | 5'-AGGAAGATGGGAGGTGTGG-3'       |
| <i>CCR2</i>                | 5'- CCCC AACGAGGCATAGA -3'      | 5'- AAGAGTCTCTGTCACTGCG -3'     |
| <i>MMP9</i>                | 5'-CGTCTTCCCCTTCACTTTCC-3'      | 5'-CCCCACTTCTGTGCGTGT-3'        |
| <i>BATF3</i>               | 5'-AGGAAGGTCCGAAGGAGAGA-3'      | 5'-GAGGCACTGGCACAAAGTTC-3'      |
| <i>MX1</i>                 | 5'-CTGGGATTTTGGGGCTTT-3'        | 5'-GGGATGTGGCTGGAGATG-3'        |
| <i>OAS1</i>                | 5'- TCAGAAATACCCAGCCAAA-3'      | 5'-GAGCCACCTTTACCACCTT-3'       |
| <i>TMPRSS2</i>             | 5'-CCTCTAACCTGGTGTGATGGCGT-3'   | 5'-TGCCAGGACTTCTCTGAGATG-3'     |
| <i>ACTB</i>                | 5'-CTGTCTGGCGCACCAACCAT-3'      | 5'-GCAACTAAGTCATAGTCCGC-3'      |
|                            |                                 |                                 |
| <b>ChIP Assays Primers</b> |                                 |                                 |
|                            |                                 |                                 |
| <b>PROMOTER</b>            | <b>Forward Primer</b>           | <b>Reverse Primer</b>           |
| <i>IL1B Proximal</i>       | 5'-TAGTTTGCTACTCTTGCCCT-3'      | 5'-AGGAAAGGGGAAAAGAGTATTGGT-3'  |
| <i>IL1B Medial</i>         | 5'-TGAATGAAGAAAAGTATGTGCATGT-3' | 5'-AAATACTGGATTTCCACGTTAG-3'    |
| <i>IL6 Proximal</i>        | 5'-AGCCTCAATGACGACCTAAGC-3'     | 5'-GGGTGGGGCTGATTGGAAA-3'       |
| <i>IL6 Medial</i>          | 5'-ACCTTCTTCATAATCCAGGC-3'      | 5'-AGGCTAGAATTAGCGTTCAGT-3'     |
| <i>TNF Proximal</i>        | 5'-ATGCTTGTGTGTCCTCAACT-3'      | 5'-CAGCGGAAAACCTTCTGGTG-3'      |
| <i>TNF Medial</i>          | 5'-GACCCAAACACAGGCCTCA-3'       | 5'-ACTAGAAGTGGGAGGGCTT-3'       |
| <i>TNF Distal</i>          | 5'-GTCCAGGGCTATGGAAGTCG-3'      | 5'-CCCAGTGTGTGGCCATATCTT-3'     |

511

512

513 **Real-Time Bioenergetic Analysis**

514 Bioenergetic assays were carried out using an Agilent Seahorse XF HS Mini Analyzer. 10<sup>5</sup>  
515 MDDCs were adhered with Cell-Tak® to Seahorse plates and treated with stimuli of TLR3,  
516 TLR7, and TLR8, as well as sonicated zymosan to activate the fungal pattern receptor dectin-  
517 1 and TLR2, after a stabilization period. OCR and ECAR were analyzed according to the XF  
518 Cell Mito Stress Test kit protocol in XF media under the experimental conditions and in  
519 response to metformin, oligomycin, FCCP, and rotenone plus antimycin A.

520

### 521 **Aggresome Formation Assay**

522 The formation of aggresomes due to ER stress was assayed by flow cytometry fluorescence  
523 using the Proteostat® aggresome detection kit of ENZO according to the manufacturer's  
524 instructions. The proteasome inhibitor MG132 was used as a positive control. MDDCs were  
525 incubated under different conditions and then fixed, stained with Proteostat® dye and used for  
526 the assay of fluorescence in a Gallios flow cytometer at 488 nm in the FL3 channel using the  
527 Kaluza software version 1.1 for quantitative analysis (Beckman Coulter Life Sciences).

528

### 529 **Chromatin Immunoprecipitation (ChIP) Assay**

530 Chromatin immunoprecipitation assays were conducted using a rabbit mAb (Cell Signaling  
531 Technology) against sXBP1 as previously reported [10]. Briefly, MDDCs were stimulated,  
532 washed with PBS, and fixed with 1% formaldehyde. Cross-linking was terminated by 0.125 M  
533 glycine. Crude nuclear extracts were collected by microcentrifugation. Chromatin sonication  
534 was carried out using a Bioruptor device (Diagenode). The chromatin solution was precleared  
535 by adding Protein A/G PLUS-Agarose for 30 min at 4°C under continuous rotation. After  
536 elimination of the beads, mAb was added for overnight incubation at 4°C, and then Protein  
537 A/G PLUS-Agarose was added and incubated for an additional period of 2 h at 4°C. Beads  
538 were harvested by centrifugation at 4,000 x g and sequentially washed with lysis buffer high

539 salt, wash buffer, and elution buffer. Cross-links were reversed by heating at 67°C in a water  
540 bath, and the DNA bound to the beads isolated by extraction with  
541 phenol/chloroform/isoamylalcohol. Irrelevant Ab was used as control of binding specificity.  
542 The sequences of the primers are shown in Table 1. Results are expressed as percentage of  
543 input.

544

### 545 **Quantification and Statistical Analysis**

546 Data are represented as the mean  $\pm$  SEM and were analyzed with the Prism 9.0 statistical  
547 program. Repeated measures one-way and two-way ANOVA analyses were performed. When  
548 data did not follow normal distribution nor had equal variances, log-transformation was applied  
549 before analysis. Comparison between experimental groups was carried out using unpaired or  
550 paired two-tailed Student's *t*-test and Wilcoxon signed-rank test, and Welch's test. Statistical  
551 details are shown in the Fig legends. Differences were considered significant for  $p < 0.05$ .

552

### 553 **ACKNOWLEDGMENTS**

554

555 José Javier Fernández is the recipient of a grant from *Junta de Castilla y León*. Cristina  
556 Mancebo is the recipient of a pre-doctoral grant from the Valladolid Section of *Asociación*  
557 *Española contra el Cáncer (AECC)*. *Biobanco del Centro de Hemoterapia y Hemodonación*  
558 *de Castilla y León* is thanked for providing buffy coats. Staff from the Intensive Care Unit of  
559 *Hospital Clínico Universitario de Valladolid* is thanked for the effort devoted to patient follow-  
560 up care and sample collection. BioRender.com software was used in some figures.

561

### 562 **AUTHOR CONTRIBUTIONS**

563

564 **Conceptualization:** Antonio Orduña, Juan Cubillos-Ruiz, Elena Bustamante, Nieves  
565 Fernández, Mariano Sánchez Crespo.

566 **Data curation:** José J. Fernández, Sonsoles Garcinuño, Gabriel March, Luis Inglada, Antonio  
567 Orduña, Juan Cubillos-Ruiz, Elena Bustamante, Mariano Sánchez Crespo.

568 **Formal analysis:** José J. Fernández, Yolanda Alvarez, Luis Inglada, Jesús Blanco, Antonio  
569 Orduña, Elena Bustamante, Nieves Fernández, Mariano Sánchez Crespo.

570 **Funding acquisition:** Nieves Fernández, Mariano Sánchez Crespo.

571 **Investigation:** José J. Fernández, Cristina Mancebo, Sonsoles Garcinuño, Gabriel March,  
572 Yolanda Alvarez, Sara Alonso, Luis Inglada, Jesús Blanco, Antonio Orduña, Olimpio Montero,  
573 Tito A. Sandoval, Juan Cubillos-Ruiz, Elena Bustamante, Nieves Fernández, Mariano Sánchez  
574 Crespo.

575 **Methodology:** José J. Fernández, Cristina Mancebo, Sonsoles Garcinuño, Gabriel March,  
576 Yolanda Alvarez, Sara Alonso, Olimpio Montero, Elena Bustamante, Luis Inglada, Jesús  
577 Blanco, Tito A. Sandoval, Antonio Orduña, Elena Bustamante.

578 **Project administration:** Nieves Fernández.

579 **Resources:** Nieves Fernández.

580 **Supervision:** Nieves Fernández, Mariano Sánchez Crespo.

581 **Validation:** Elena Bustamante, Luis Inglada, Jesús Blanco, Elena Bustamante, Nieves  
582 Fernández.

583 **Visualization:** José J. Fernández, Nieves Fernández, Mariano Sánchez Crespo.

584 **Writing – original draft:** Luis Inglada, Jesús Blanco, Tito A. Sandoval, Juan Cubillos-Ruiz,  
585 Nieves Fernández, Mariano Sánchez Crespo.

586 **Writing – review & editing:** Luis Inglada, Jesús Blanco, Tito A. Sandoval, Juan Cubillos-  
587 Ruiz, Elena Bustamante, Nieves Fernández, Mariano Sánchez Crespo.

588

589 **FUNDING**

590

591 This study was funded by *Fondo COVID-19 del Instituto de Salud Carlos III/Junta de Castilla*  
592 *y León* (N.F.). European Commission-NextGenerationEU, through CSIC's Global Health  
593 Platform (PTI Salud Global) (project SGL2103016) (M.S.C.). *Plan Nacional de Salud y*  
594 *Farmacía* Grant SAF2017-83079-R and Grant PID2020-113751RB-I00 funded by  
595 MCIN/AEI/ 10.13039/501100011033 (M.S.C.). *Junta de Castilla y León/Fondo Social*  
596 *Europeo* Grants CSI035P17 (M.S.C.) and VA175P20 (N.F.). *Proyecto SEAHORSE*  
597 *INFRARED: IR2020-1-UVA05* (JCyL). The funders had no role in study design, data  
598 collection and analysis, decision to publish, or preparation of the manuscript.

599

600



601 **REFERENCES**

602

603 1. Fajgenbaum DC, June CH. Cytokine storm. *N Engl J Med*. 2020;383: 2255-2273.

604 2. Riva G, Nasillo V, Tagliafico E, Trenti T, Comoli P, Luppi M. COVID-19: more than a  
605 cytokine storm. *Crit. Care*. 2020;24: 549.

606 3. Hetz C, Zhang K, Kaufman RJ. Mechanisms, regulation and functions of the unfolded protein  
607 response. *Nat Rev Mol Cell Biol*. 2012;13: 89-102.

608 4. Bettigole SE, Glimcher LH. Endoplasmic reticulum stress in immunity. *Annu Rev Immunol*.  
609 2015;33: 107-138.

610 5. Chen X, Cubillos-Ruiz, JR. Endoplasmic reticulum stress signals in the tumour and its  
611 microenvironment. *Nat Rev Cancer*. 2021;21: 71-88.

612 6. Calton M, Zeng H, Urano F, Till JH, Hubbard SR, Harding HP, et al. IRE1 couples  
613 endoplasmic reticulum load to secretory capacity by processing the XBP-1 mRNA.  
614 *Nature*. 2002;415: 92-96.

615 7. Chopra S, Giovanelli P, Alvarado-Vazquez PA, Alonso S, Song M, Sandoval TA, et al.  
616 IRE1 $\alpha$ -XBP1 signaling in leukocytes controls prostaglandin biosynthesis and pain.  
617 *Science*. 2019;365(6450): eaau6499.

618 8. Martinon F, Chen X, Lee AH, Glimcher LH. TLR activation of the transcription factor XBP1  
619 regulates innate immune responses in macrophages. *Nat Immunol*. 2011;11: 411-418.

620 9. Zeng L, Liu YP, Sha H, Chen H, Qi L, Smith JA. XBP-1 couples endoplasmic reticulum  
621 stress to augmented IFN- $\beta$  induction via a *cis*-acting enhancer in macrophages. *J*  
622 *Immunol*. 2010;185: 2324-2330.

623 10. Márquez S, Fernández JJ, Terán-Cabanillas E, Herrero C, Alonso S, Azogil A, et al.  
624 Endoplasmic reticulum stress sensor IRE1 $\alpha$  enhances IL-23 expression by human  
625 dendritic cells. *Front Immunol*. 2017;8: 639.

626 11. Mogilenko DA, Haas JT, L'homme L, Fleury S, Quemener S, Levvasseur, et al. Metabolic  
627 and innate immune cues merge into a specific inflammatory response via the UPR. *Cell*.  
628 2019;177: 1201-1216.

629 12. Keestra-Gounder AM, Byndloss MX, Seyffert N, Young BM, Chávez-Arroyo A, Tsai AY,  
630 et al. NOD1 and NOD2 signalling links ER stress with inflammation. *Nature*. 2016;532:  
631 394-397.

- 632 13. Qiu Q, Zheng Z, Chang L, Zhao YS, Tan C, Dandekar A, et al. Toll-like receptor-mediated  
633 IRE1 $\alpha$  activation as a therapeutic target for inflammatory arthritis. *EMBO J.* 2013;32:  
634 2477-2490.
- 635 14. Rosen DA, Seki SM, Fernández-Castañeda A, Beiter RM, Eccles JD, Woodfolk JA, et al.  
636 Modulation of the sigma-1 receptor-IRE1 pathway is beneficial in preclinical models  
637 of inflammation and sepsis. *Sci Transl Med.* 2019;11(478):eaau5266.
- 638 15. Sule G, Abuaita BH, Steffes PA, Fernandes AT, Estes SK, Dobry C, et al. Endoplasmic  
639 reticulum stress sensor IRE1 $\alpha$  propels neutrophil hyperactivity in lupus. *J Clin Invest.*  
640 2021;131(7):e137866.
- 641 16. Prasad, V, Suomalainen M, Jasiqi Y, Hemmi S, Hearing P, Hosie L, et al. The UPR sensor  
642 IRE1 $\alpha$  and the adenovirus E3-19K glycoprotein sustain persistent and lytic infections.  
643 *Nat Commun.* 2020;11: 1997.
- 644 17. Prasad V, Greber UF. The endoplasmic reticulum unfolded protein response - homeostasis,  
645 cell death and evolution in virus infections. *FEMS Microbiol Rev.* 2021;45: fuab016.
- 646 18. Hrinčius ER, Liedmann S, Finkelstein D, Vogel P, Gansebom S, Samarasinghe AE, et al.  
647 Acute lung injury results from innate sensing of viruses by an ER stress pathway. *Cell*  
648 *Rep.* 2015;11: 1591-1603.
- 649 19. Rosa-Fernandes L, Lazari LC, Macedo da Silva J, de Moraes Gomes V, Guaragna Machado  
650 RR, Ferreira dos Santos A, et al. SARS-CoV-2 activates ER stress and unfolded protein  
651 response. *bioRxiv.* 2021;doi: <https://doi.org/10.1101/2021.06.21.449284>.
- 652 20. Liu N, Jiang C, Cai P, Shen Z, Sun W, Xu H, et al. Single-cell analysis of COVID-19,  
653 sepsis, and HIV infection reveals hyperinflammatory and immunosuppressive  
654 signatures in monocytes. *Cell Rep.* 2021;37: 109793.
- 655 21. Blanco-Melo D, Nilsson-Payant BE, Liu WC, Uhl S, Hoagland D, Möller R, et al.  
656 Imbalanced host response to SARS-CoV-2 drives development of COVID-19. *Cell.*  
657 2020;81: 1036–1045.
- 658 22. Xu X, Han M, Li T, Sun W, Wang D, Fu B, et al. Effective treatment of severe COVID-19  
659 patients with tocilizumab. *Proc Natl Acad Sci USA.* 2020;117: 10970-10975.
- 660 23. Acosta-Alvear D, Zhou Y, Blais A, Tsikitis M, Lents NH, Arias C, et al. XBP1 controls  
661 diverse cell-type and condition-specific transcriptional regulatory networks. *Mol Cell.*  
662 2007;27: 53-66.
- 663 24. Cubillos-Ruiz JR, Silberman PC, Rutkowski MR, Chopra S, Perales-Puchalt A, Song M, et  
664 al. ER stress sensor XBP1 controls anti-tumor immunity by disrupting dendritic cell  
665 homeostasis. *Cell.* 2015;161: 1527-1538.  
666

- 667 25. Song M, Sandoval TA, Chae CS, Chopra S, Tan C, Rutkowski MR, et al. IRE1 $\alpha$ -XBP1  
668 controls T cell function in ovarian cancer by regulating mitochondrial activity. *Nature*.  
669 2018;562: 423-428.
- 670 26. Echavarría-Consuegra L, Cook GM, Busnadiego I, Lefèvre C, Keep S, Brown K, et al.  
671 Manipulation of the unfolded protein response: A pharmacological strategy against  
672 coronavirus infection. *PLoS Pathog*. 2021;17(6):e1009644.
- 673 27. Nguyen LC, Yang D, Nicolaescu V, Best TJ, Gula H, Saxena D, et al. Cannabidiol inhibits  
674 SARS-CoV-2 replication through induction of the host ER stress and innate immune  
675 responses. *Sci Adv*. 2022 Jan 20:6110. Epub ahead of print. PMID: 35050692.  
676
- 677 28. van der Made CI, Simons A, Schuurs-Hoeijmakers J, van den Heuvel G, Mantere T, Kersten  
678 S, et al. Presence of genetic variants among young men with severe COVID-19. *JAMA*.  
679 2020;324: 1-11.
- 680 29. Rodríguez M, Domingo E, Alonso S, Frade JG, Eiros J, Sánchez Crespo M, et al. The  
681 unfolded protein response and the phosphorylations of activating transcription factor 2  
682 in the trans-activation of *IL23A* promoter produced by  $\beta$ -glucans. *J Biol Chem*.  
683 2014;289: 22942-22957.
- 684 30. Turini ME, DuBois RN. Cyclooxygenase-2: A Therapeutic Target. *Annu Rev Med*.  
685 2002;53: 35-57.
- 686 31. Codo AC, Davanzo GG, Monteiro LB, de Souza GF, Muraro SP, Virgilio-da-Silva JV, et  
687 al. Elevated glucose levels favor SARS-CoV-2 infection and monocyte response  
688 through a HIF-1 $\alpha$ /glycolysis-dependent axis. *Cell Metab*. 2020;32: 437-446.
- 689 32. O'Carroll SM, O'Neill LAJ. Targeting immunometabolism to treat COVID-19. *Immunother*  
690 *Adv*. 2021;1: ltab013.
- 691 33. Song R, Gao Y, Dozmorov I, Malladi V, Saha I, McDaniel MM, et al. IRF1 governs the  
692 differential interferon-stimulated gene responses in human monocytes and  
693 macrophages by regulating chromatin accessibility. *Cell Rep*. 2021;34: 108891.
- 694 34. Hoffmann M, Kleine-Weber H, Schroeder S, Krüger N, Herrler T, Erichsen S, et al. SARS-  
695 CoV-2 cell entry depends on ACE2 and TMPRSS2 and is blocked by a clinically proven  
696 protease inhibitor. *Cell*. 2020;181: 271-280.
- 697 35. Andolfo I, Russo R, Lasorsa VA, Cantalupo S, Rosato BE, Bonfiglio F, et al. Common  
698 variants at 21q22.3 locus influence *MXI* and *TMPRSS2* gene expression and  
699 susceptibility to severe COVID-19. *iScience*. 2021;24: 102322.
- 700 36. Hadjadj J, Yatim N, Barnabei L, Corneau A, Boussier J, Smith N, et al. Impaired type I  
701 interferon activity and inflammatory responses in severe COVID-19 patients. *Science*.  
702 2020;369: 718-724.

- 703 37. Karki R, Sharma BR, Tuladhar S, Williams EP, Zalduondo L, Samir P, et al. Synergism of  
704 TNF- $\alpha$  and IFN- $\gamma$  triggers inflammatory cell death, tissue damage, and mortality in  
705 SARS-CoV-2 infection and cytokine shock syndromes. *Cell*. 2021;184: 149-168.e17.
- 706 38. Huang KJ, Su IJ, Theron M, Wu YC, Lai SK, Liu CC, et al. An interferon- $\gamma$ -related cytokine  
707 storm in SARS patients. *J Med Virol*. 2005;75: 185-194.
- 708 39. Broggi A, Ghosh S, Sposito B, Spreafico R, Balzarini F, Lo Cascio A, et al. Type III  
709 interferons disrupt the lung epithelial barrier upon viral recognition. *Science*. 2020;369:  
710 706-712.
- 711 40. Gao DK, Salomonis N, Henderlight M, Woods C, Thakkar K, Grom AA, et al. IFN- $\gamma$  is  
712 essential for alveolar macrophage driven pulmonary inflammation in macrophage  
713 activation syndrome. *JCI Insight*. 2021;27: 147593.
- 714 41. Verma AK, Bauer C, Palani S, Metzger DW, Sun K. IFN- $\gamma$  drives TNF- $\alpha$  hyperproduction  
715 and lethal lung inflammation during antibiotic treatment of postinfluenza  
716 staphylococcus aureus pneumonia. *J Immunol*. 2021;207: 1371-1376.
- 717 42. Mimura N, Fulciniti M, Gorgun G, Tai YT, Cirstea D, Santo L, et al. Blockade of XBP1  
718 splicing by inhibition of IRE1 $\alpha$  is a promising therapeutic option in multiple myeloma.  
719 *Blood*. 2012;119: 5772-5781.
- 720 43. Krawczyk CM, Holowka T, Sun J, Blagih J, Amiel E, DeBerardinis RJ, et al. Toll-like  
721 receptor-induced changes in glycolytic metabolism regulate dendritic cell activation.  
722 *Blood*. 2010;115: 4742-4749.
- 723 44. Xian H, Liu Y, Rundberg Nilsson A, Gatchalian R, Crother TR, Tourtellotte WG, et al.  
724 Metformin inhibition of mitochondrial ATP and DNA synthesis abrogates NLRP3  
725 inflammasome activation and pulmonary inflammation. *Immunity*. 2021;54: 1463-  
726 1477.e11.
- 727 45. Kelly B, Tannahill GM, Murphy MP, O'Neill LA. Metformin inhibits the production of  
728 reactive oxygen species from NADH:ubiquinone oxidoreductase to limit induction of  
729 interleukin-1 $\beta$  (IL-1 $\beta$ ) and boosts interleukin-10 (IL-10) in lipopolysaccharide (LPS)-  
730 activated macrophages. *J Biol Chem*. 2015;290: 20348-20359.
- 731 46. Baselski VS, Wunderink RG. Bronchoscopic diagnosis of pneumonia. *Clin Microbiol Rev*.  
732 1994;7: 533-558.
- 733 47. Shin YM, Oh YM, Kim MN. Usefulness of quantitative endotracheal aspirate cultures in  
734 intensive care unit patients with suspected pneumonia. *J Korean Med Sci*. 2011;26: 865-  
735 869.

- 736 48. Pickens C, Wunderink RG, Qi C, Mopuru H, Donnelly H, Powell K, et al. A multiplex  
737 polymerase chain reaction assay for antibiotic stewardship in suspected pneumonia.  
738 *Diagn Microbiol Infect Dis.* 2020;98: 115179.
- 739 49. Zhou Z, Ren L, Zhang L, Zhong J, Xiao Y, Jia Z, et al. Heightened innate immune responses  
740 in the respiratory tract of COVID-19 patients. *Cell Host Microbe.* 2020;27: 883-890.
- 741 50. Liao M, Liu Y, Yuan J, Wen Y, Xu G, Zhao J, et al. Single-cell landscape of  
742 bronchoalveolar immune cells in patients with COVID-19. *Nat. Med.* 2020;26: 842-  
743 844.
- 744 51. Szabo PA, Dogra P, Gray JJ, Wells SB, Connors TJ, Weisberg SP, et al. Developmental  
745 regulation of effector and resident memory T cell generation during pediatric viral  
746 respiratory tract infection. *J Immunol.* 2018;201: 432-439.
- 747 52. Connors TJ, Baird JS, Yopes MC, Zens KD, Pethe K, Ravindranath TM, et al.  
748 Developmental regulation of effector and resident memory T cell generation during  
749 pediatric viral respiratory tract Infection. *J Immunol.* 2018;201: 432-439.
- 750 53. Connors TJ, Ravindranath TM, Bickham KL, Gordon CL, Zhang F, Levin B, et al. Airway  
751 CD8(+) T cells are associated with lung injury during infant viral respiratory tract  
752 infection. *Am J Respir Cell Mol Biol.* 2016;54: 822-830.
- 753 54. Sarma A, Christenson SA, Byrne A, Mick E, Pisco AO, DeVoe C, et al. Tracheal aspirate  
754 RNA sequencing identifies distinct immunological features of COVID-19 ARDS. *Nat*  
755 *Commun.* 2021;12:5152.
- 756 55. Sinha P, Matthay MA, Calfee CS. Is a "Cytokine Storm" relevant to COVID-19? *JAMA*  
757 *Intern Med.* 2020;180:1152-1154.
- 758 56. Kox M, Waalders NJB, Kooistra EJ, Gerretsen J, Pickkers P. Cytokine levels in critically  
759 ill patients with COVID-19 and other conditions. *JAMA.* 2020;324:1565-1567.
- 760 57. Lenze EJ, Mattar C, Zorumski CF, Stevens A, Schweiger J, Nicol GE, et al. Fluvoxamine  
761 vs placebo and clinical deterioration in outpatients with symptomatic COVID-19: A  
762 randomized clinical trial. *JAMA.* 2020;324: 2292-2300.
- 763 58. Reis G, dos Santos Moreira-Silva EA, Medeiros Silva DC, Thabane L, Cruz Milagres A,  
764 Santiago Ferreira T, et al. Effect of early treatment with fluvoxamine on risk of  
765 emergency care and hospitalisation among patients with COVID-19: the TOGETHER  
766 randomised, platform clinical trial. *Lancet Glob Health* 2022 Jan;10(1):e42-e51.  
767
- 768 59. Shi S, Blumenthal A, Hickey CM, Gandotra S, Levy D, Ehrt S. Expression of many  
769 immunologically important genes in *Mycobacterium tuberculosis*-infected  
770 macrophages is independent of both TLR2 and TLR4 but dependent on IFN- $\alpha\beta$  receptor  
771 and STAT1. *J Immunol.* 2005;175: 3318-3328.

- 772 60. Michelucci A, Cordes T, Ghelfi J, Pailot A, Reiling N, Goldmann O, et al. Immune-  
773 responsive gene 1 protein links metabolism to immunity by catalyzing itaconic acid  
774 production. *Proc Natl Acad Sci USA*. 2013;110: 7820-7825.
- 775 61. Hooftman A, Angiari S, Hester S, Corcoran SE, Runtsch MC, Ling C, et al. The  
776 immunomodulatory metabolite itaconate modifies NLRP3 and inhibits inflammasome  
777 activation. *Cell Metab*. 2020;32: 468-478.
- 778 62. Giamarellos-Bourboulis EJ, Netea MG, Rovina N, Akinosoglou K, Antoniadou A,  
779 Antonakos N, et al. Complex immune dysregulation in COVID-19 patients with severe  
780 respiratory failure. *Cell Host Microbe*. 2020;27: 992-1000.e3.
- 781 63. Rappe JCF, Finsterbusch K, Crotta S, Mack M, Priestnall SL, Wack A. A TLR7 antagonist  
782 restricts interferon-dependent and -independent immunopathology in a mouse model of  
783 severe influenza. *J Exp Med*. 2021;218: e20201631.
- 784 64. Li Y, Chen M, Cao H, Zhu Y, Zheng J, Zhou H. Extraordinary GU-rich single-strand RNA  
785 identified from SARS coronavirus contributes an excessive innate immune response.  
786 *Microbes Infect*. 2013;15: 88-95.
- 787 65. Campbell GR, To RK, Hanna J, Spector SA. SARS-CoV-2, SARS-CoV-1, and HIV-1  
788 derived ssRNA sequences activate the NLRP3 inflammasome in human macrophages  
789 through a non-classical pathway. *iScience*. 2021;24: 102295.
- 790 66 Fallerini C, Daga S, Mantovani S, Benetti E, Picchiotti N, Francisci D, et al. Association of  
791 Toll-like receptor 7 variants with life-threatening COVID-19 disease in males: findings  
792 from a nested case-control study. *Elife*. 2021;10: e67569.
- 793 67. Zhang Q, Bastard P, Liu Z, Le Pen J, Moncada-Velez M, Chen J, et al. Inborn errors of type  
794 I IFN immunity in patients with life-threatening COVID-19. *Science*. 2020;370:  
795 eabd4570.
- 796 68. Ito T, Amakawa R, Kaisho T, Hemmi H, Tajima K, Uehira K, et al. Interferon- $\alpha$  and  
797 interleukin-12 are induced differentially by Toll-like receptor 7 ligands in human blood  
798 dendritic cell subsets. *J Exp Med*. 2002;195: 1507-1512.
- 799 69. Olson GS, Murray TA, Jahn AN, Mai D, Diercks AH, Gold ES, et al. Type I interferon  
800 decreases macrophage energy metabolism during mycobacterial infection. *Cell Rep*.  
801 2021;35: 109195.
- 802 70. Thwe PM, Fritz DI, Snyder JP, Smith PR, Curtis KD, O'Donnell A, et al. Syk-dependent  
803 glycolytic reprogramming in dendritic cells regulates IL-1 $\beta$  production to  $\beta$ -glucan  
804 ligands in a TLR-independent manner. *J Leukoc Biol*. 2019;106: 1325-1335.
- 805 71. Fan E, Del Sorbo L, Goligher EC, Hodgson CL, Munshi L, Walkey AJ, et al. An Official  
806 American Thoracic Society/European Society of Intensive Care Medicine/Society of

807           Critical Care Medicine Clinical Practice Guideline: Mechanical Ventilation in Adult  
808           Patients with Acute Respiratory Distress Syndrome. *Am J Respir Crit Care Med.*  
809           2017;195: 1253-1263.

810

811

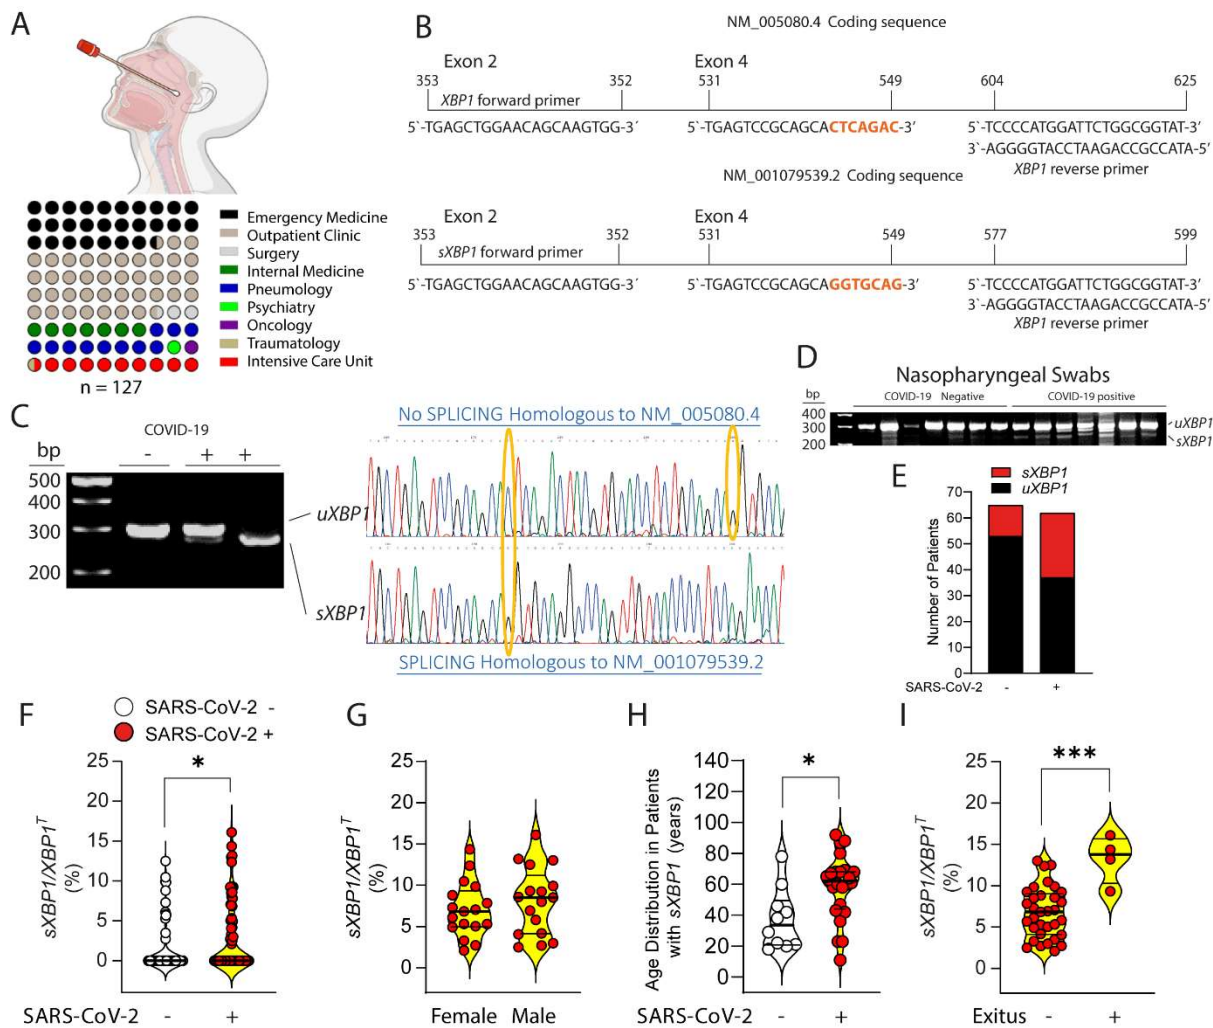

812

813

814

815

816

817

818

819

820

821

822

823

824

825

826

827

**Fig 1. Sequences of *XBPI* mRNA transcripts and analysis of RT-PCR products in nasopharyngeal samples.** (A) Medical departments involved in the obtention of nasopharyngeal swabs. (B) The splicing of 26 nucleotides in NM\_005080.4 sequence generates the 531-549 sequence in NM\_001079539.2. The position of primers, including the reverse primer spanning the spliced sequence is shown. (C) Agarose gel electrophoresis and sequencing of the amplicons obtained by RT-PCR with *XBPI* primers showing the migration of the spliced (*sXBPI*) and unspliced products (*uXBPI*). (D) The electrophoretic pattern of *XBPI* in a series of samples from COVID-19 negative and positive patients is shown. The presence of three bands in some cases is due to the formation of heteroduplexes. (E) Distribution of patients according to the presence or absence of *sXBPI* in SARS-CoV-2 negative and positive patients. (F) Quantitation of *sXBPI* versus total *XBPI* ( $XBPI^T$ ) in COVID-19 positive and negative samples. (G) Quantitation of *sXBPI* versus total *XBPI* in male and female SARS-CoV-2 positive patients. (H) Age distribution of patients with *sXBPI*. (I) Quantitation of *sXBPI* versus total *XBPI* in SARS-CoV-2 positive according to the outcome. \* $p < 0.05$ , \*\*\* $p < 0.005$ , paired or unpaired (two-tail) *t* test.



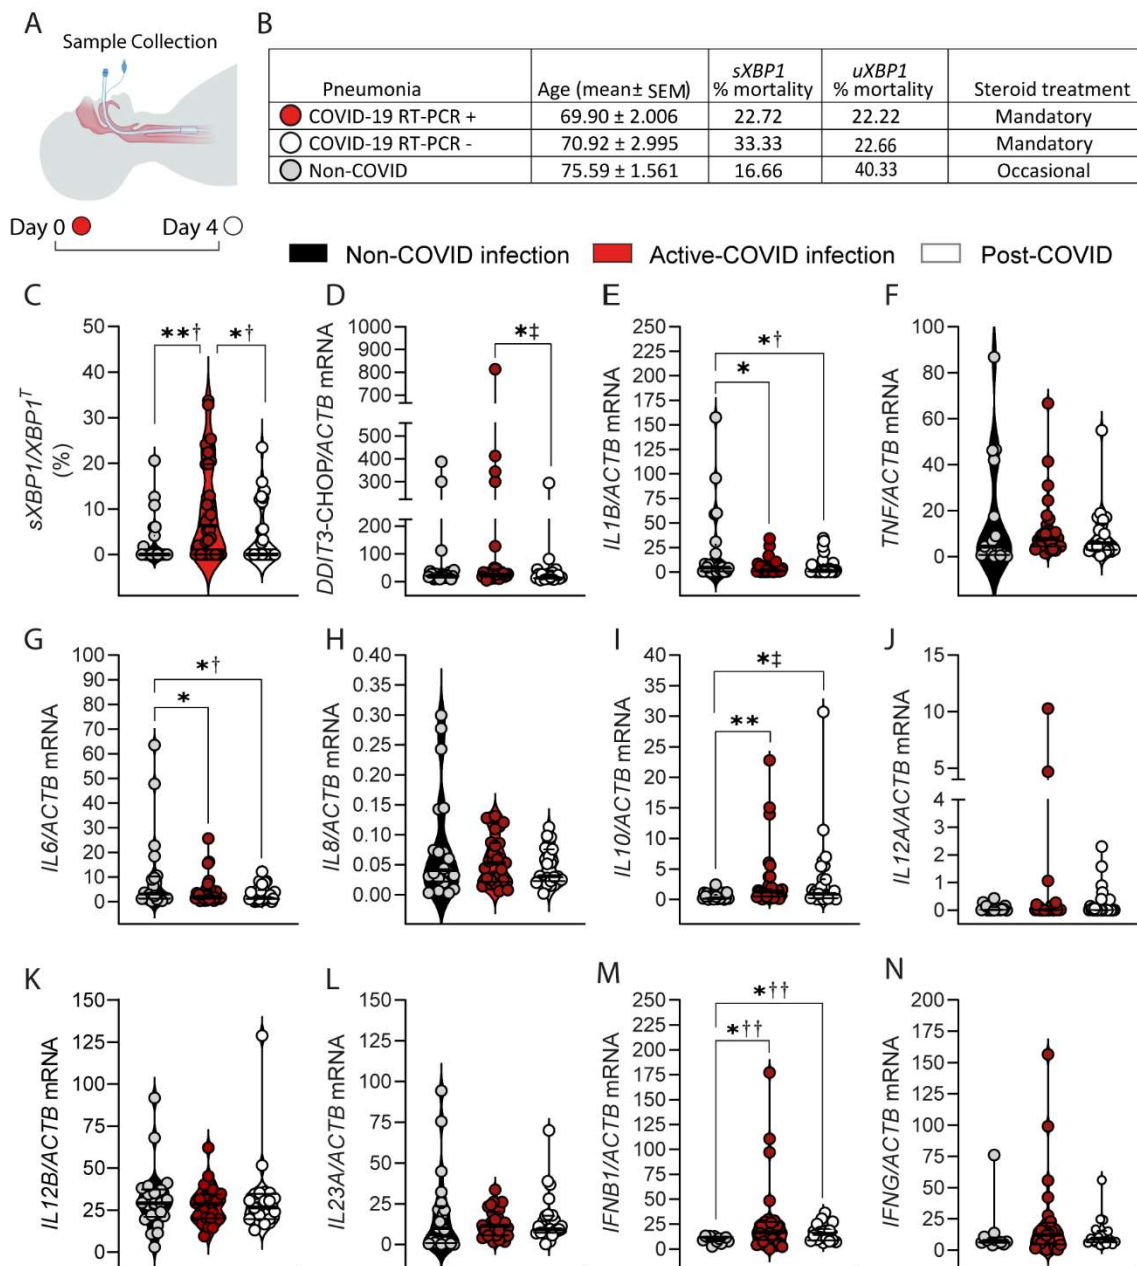

828

829

830 **Fig 2. Expression of the mRNA of *XBP1*, *DDIT3/CHOP*, and cytokines in BAAs of**  
 831 **patients under mechanical ventilation in ICU.** (A) Scheme of sample collection. (B)  
 832 Stratification of patients according to non-COVID-19, active COVID-19, and non-active  
 833 COVID-19 infection. (C) *sXBP1* expression in the different cohorts. Results are expressed as  
 834 mean ± SEM. †Ordinary one-way ANOVA with the Tukey's multiple comparisons test. \*p <  
 835 0.05. \*\*\* p < 0.005. (D) Expression of the mRNA de *DDIT3/CHOP*. ‡Kruskal-Wallis U test.  
 836 (E-N) Expression of the mRNA encoding *IL1B*, *TNF*, *IL6*, *IL8*, *IL10*, *IL12A*, *IL12B*, *IL23A*,  
 837 *IFNB1*, and *IFNG* in BAAs. Data are presented as mean ± SEM. \*p < 0.05, \*\*p < 0.01,  
 838 \*\*\*p < 0.005. †Ordinary one-way ANOVA. ‡Kruskal-Wallis U test. ††Welch and Brown-  
 839 Forsythe ANOVA test.

840  
841  
842  
843  
844  
845  
846  
847  
848  
849  
850  
851  
852  
853  
854  
855  
856  
857  
858  
859  
860  
861  
862  
863  
864  
865  
866  
867  
868  
869  
870  
871  
872  
873  
874  
875  
876  
877  
878  
879  
880  
881  
882  
883  
884  
885  
886  
887  
888

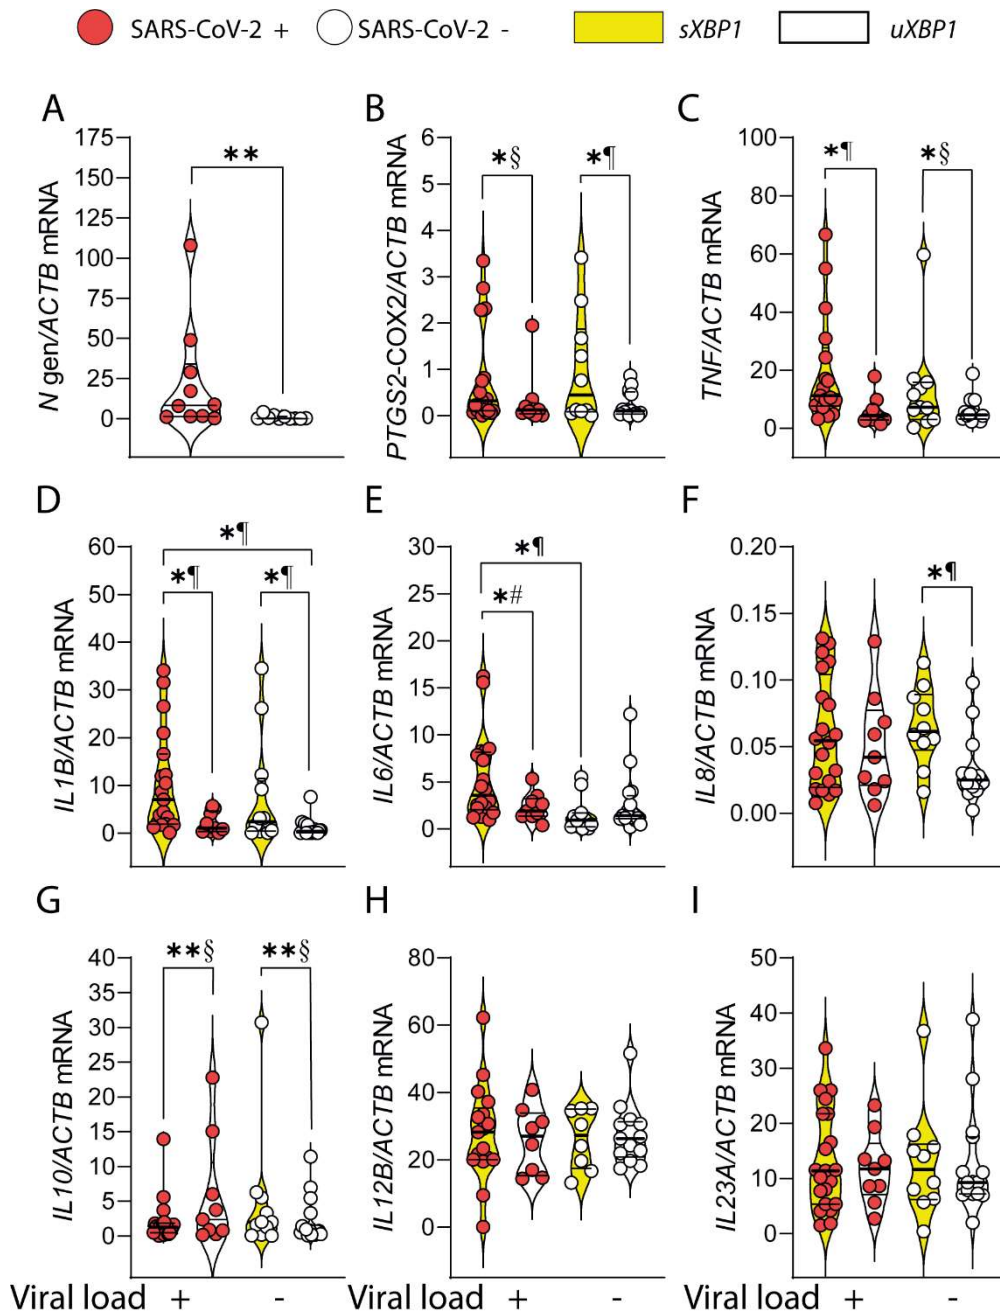

**Fig 3. Association of *sXBP1* splicing and viral replication with cytokine expression in BAAs.** (A) Viral load in samples obtained at the time of SARS-CoV-2 positive and negative tests. Data are presented as mean  $\pm$  SEM. \*\* $p < 0.01$ . Unpaired two-tailed Student's *t* test. (B-I) Patients were stratified in cohorts according to the presence of *sXBP1* and the presence or absence of viral load as deemed from RT-PCR test for SARS-CoV-2 infection. The mRNA of *PTGS2* and various cytokines was assayed in the extracted RNA and the statistical significance of the results was assayed using ordinary one-way ANOVA with Tukey's post-hoc multiple comparison test. Data are presented as mean  $\pm$  SEM. \* $p < 0.05$ , \*\* $p < 0.01$ , \*\*\* $p < 0.005$ . §One-sample Wilcoxon signed rank test. ¶Unpaired (two-tail) *t* test. #Welch's test.

889  
890  
891  
892  
893  
894  
895  
896  
897  
898  
899  
900  
901  
902  
903  
904  
905  
906  
907  
908  
909  
910  
911  
912  
913  
914  
915  
916  
917  
918  
919  
920

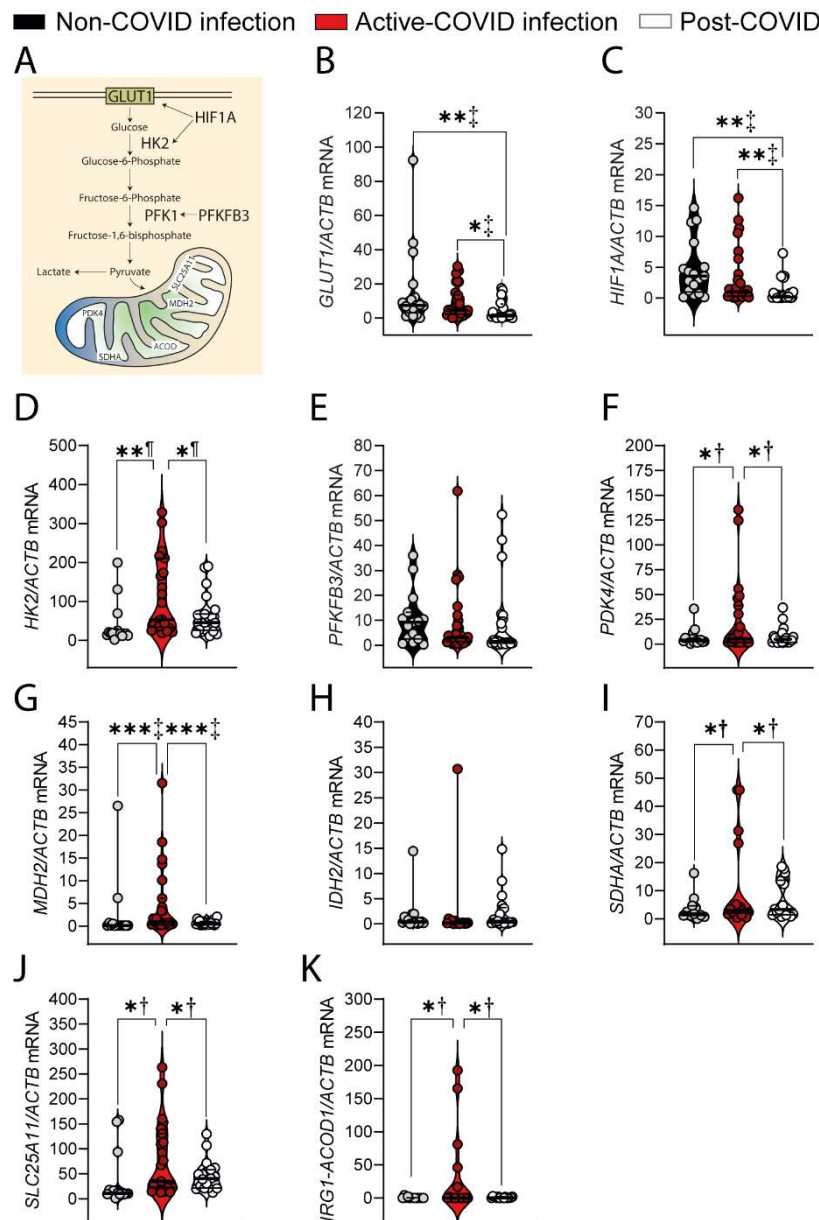

921 **Fig 4. Expression of enzymes involved in glycolysis and mitochondrial proteins.** (A)  
 922 Diagram of glycolytic and mitochondrial proteins assayed in BAAs. (B-K) BAAs of patients  
 923 with controlled respiration were used for RNA extraction and RT-PCR assay of mRNA  
 924 expression of genes encoding for proteins involved in glycolysis, response to hypoxia, and  
 925 mitochondrial function. *GLUT1*, glucose transporter 1. *HIF1A*, hypoxia-inducible factor 1 $\alpha$ .  
 926 *HK2*, hexokinase 2. *PFKFB3*, 6-phosphofructo-2-kinase/fructose-2,6-bisphosphatase. *PDK4*,  
 927 pyruvate dehydrogenase kinase. *MDH2*, malate dehydrogenase 2. *IDH2*, isocitrate  
 928 dehydrogenase 2. *SDHA*, succinate dehydrogenase protein subunit A. *SLC25A11*, mitochondrial  
 929 2-oxoglutarate-malate carrier. *IRG1-ACOD1*, immunoresponsive gene 1-aconitate  
 930 decarboxylase. Data are presented as mean  $\pm$  SEM. \* $p < 0.05$ , \*\* $p < 0.01$ , \*\*\* $p < 0.005$ .  
 931 ‡Kruskal-Wallis  $U$  test. †Ordinary one-way ANOVA. ¶Paired or unpaired (two-tail)  $t$  test.  
 932

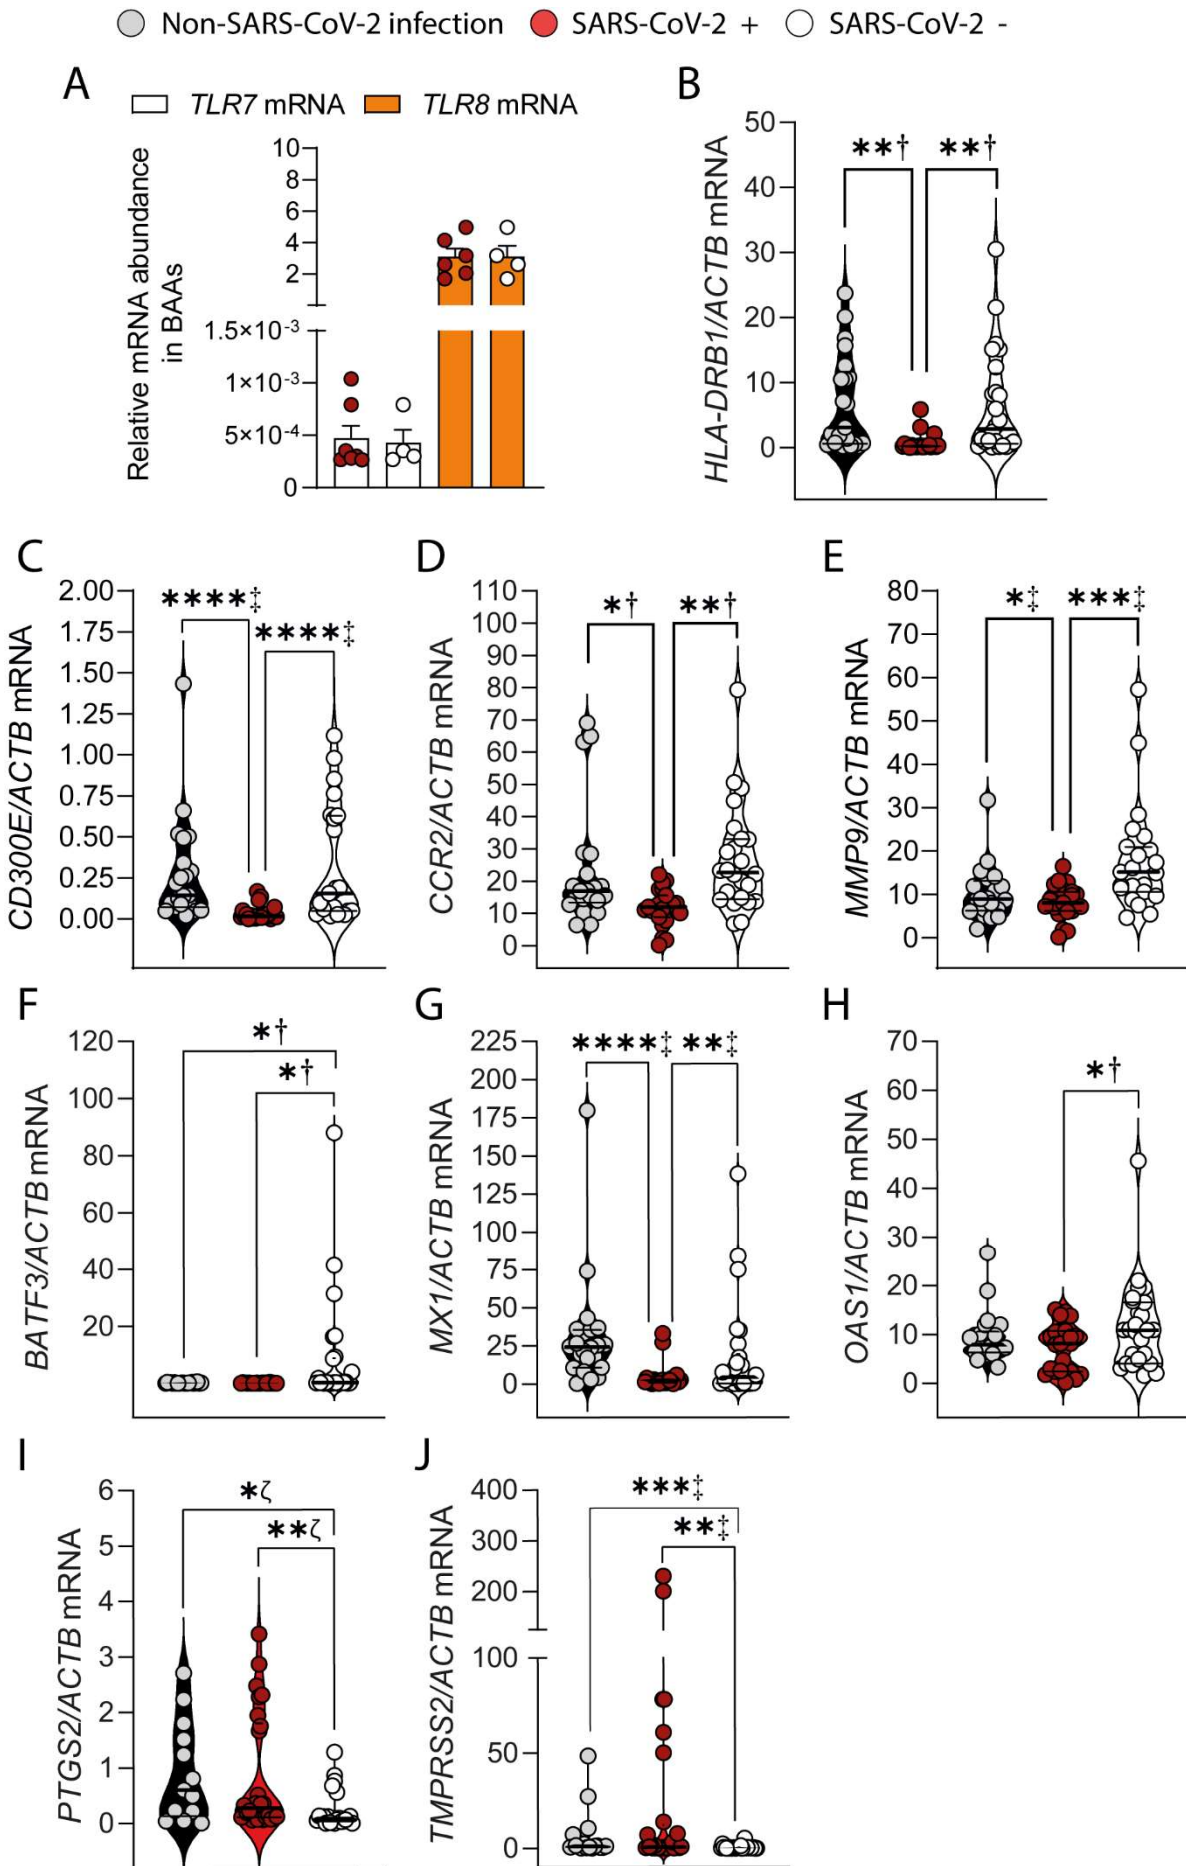

934 **Fig 5. Expression of genes involved in monocytic-lineage differentiation in BAAs.** (A)  
935 Expression of the mRNA encoding the receptors TLR7 and TLR8 in patients with active  
936 SARS-CoV-2 infection and after negative tests. (B-F) Expression of monocyte-differentiation  
937 markers in BAAs of non-COVID-19, COVID-19, and post-COVID-19 infection. (G-H)  
938 Expression of the ISG *MX1* and *OAS1* mRNA. (I) Expression of the mRNA encoding  
939 *PTGS2/COX2*. (J) Expression of the mRNA encoding the transmembrane serine protease  
940 *TMPRSS2*. Data are presented as mean  $\pm$  SEM. \* $p < 0.05$ , \*\* $p < 0.01$ , \*\*\* $p < 0.005$ . †Ordinary  
941 one-way ANOVA. ‡Kruskal-Wallis *U* test. §Holm-Sidak's multiple comparison test.  
942

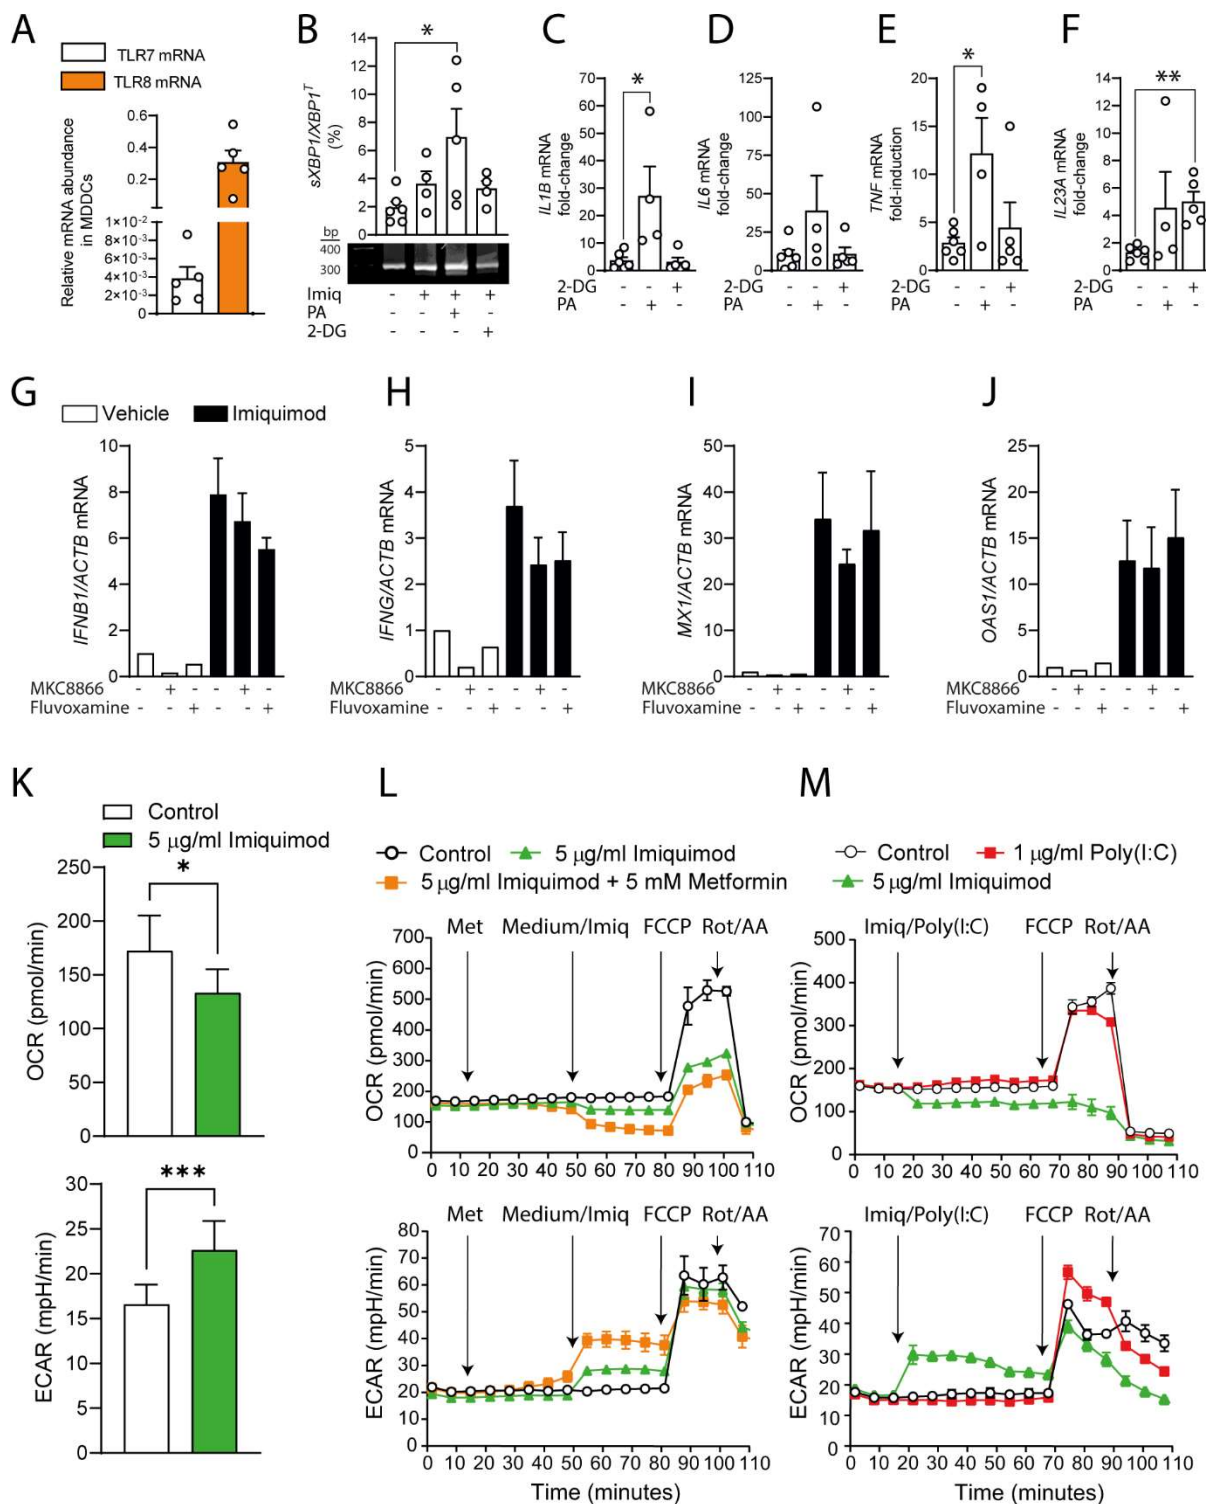

943

944 **Fig 6. Expression of TLR7 and TLR8 receptors in MDDCs and response to the TLR7**  
 945 **agonist imiquimod.** (A) Expression of the mRNA encoding TLR7 and TLR8 in MDDCs. (B)  
 946 Effect of 5  $\mu\text{g/ml}$  imiquimod on *sXBP1* in the presence and absence of 0.5 mM palmitate (PA)  
 947 and 10 mM 2-deoxyglucose (2-DG). MDDCs were incubated for one hour in the presence of  
 948 the indicated additions and then stimulated with imiquimod for 1 hour. At the end of this time,  
 949 the RNA was extracted and used for the assay of *sXBP1*. (C-F) Effect of imiquimod on the  
 950 expression of the mRNA encoding *IL1B*, *TNF*, *IL6*, and *IL23A*. The stimulation with

951 imiquimod was maintained for four hours before RNA extraction. Data are presented as mean  
952  $\pm$  SEM. \* $p < 0.05$ , \*\* $p < 0.01$ . (G-J) Effect of MKC8866 and fluvoxamine on the expression  
953 of the mRNA encoding *IFNB1*, *IFNG*, *MX1*, and *OAS1*. MDDCs were preincubated with 10  
954  $\mu$ M MKC8866 and 20  $\mu$ M fluvoxamine for one hour and then stimulated with 5  $\mu$ g/ml  
955 imiquimod for 4 hours. At the end of this time, the RNA was extracted and used for mRNA  
956 assay. (K) Effect of imiquimod on O<sub>2</sub> consumption rate (OCR) and glycolysis assayed as  
957 extracellular acidification rate (ECAR). Data are presented as mean  $\pm$  SEM. \* $p < 0.05$ , \*\*\* $p <$   
958 0.005, paired, (two-tail) Student's *t* test. (L) Seahorse real-time metabolic analysis of one  
959 experiment where MDDCs were stimulated with imiquimod and then treated with 2  $\mu$ M FCCP  
960 (an uncoupler of oxidative phosphorylation) to estimate maximal respiratory rate, and the  
961 combination 0.5  $\mu$ M rotenone/antimycin (Rot/AA) to inhibit complex I and complex III of the  
962 mitochondrial electron transport chain. Where indicated, metformin was used to inhibit  
963 complex I activity. (M) MDDCs were treated with imiquimod or with poly(I:C) to show the  
964 effect of a TLR3 agonist.

965

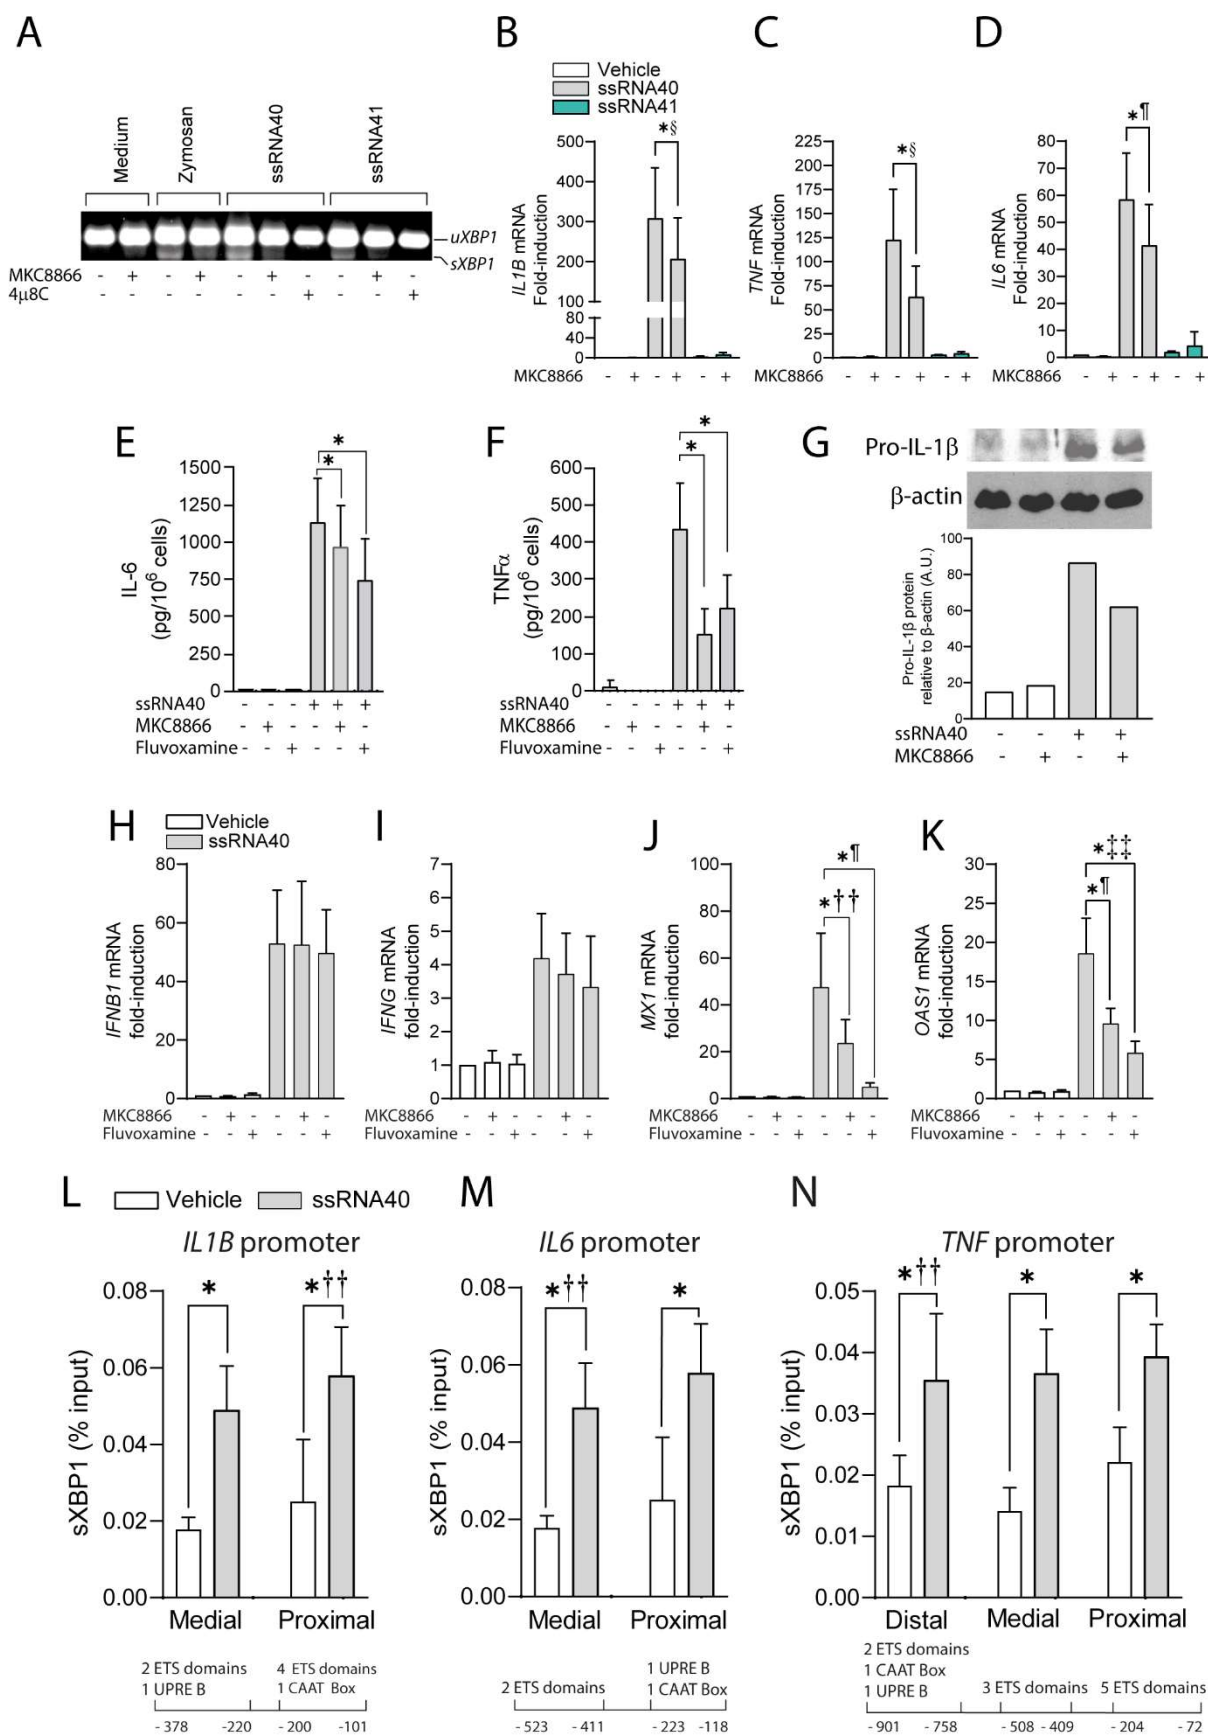



968  
969  
970  
971  
972  
973  
974  
975  
976  
977  
978  
979  
980  
981  
982  
983  
984  
985  
986  
987  
988  
989  
990  
991  
992  
993  
994  
995  
996

**Fig 7. Effect of the TLR8 agonist ssRNA40 on MDDCs.** (A) Effect of ssRNA40 and IRE1 $\alpha$  RNase inhibitors on *sXBP1*. The RNA was collected after one hour of incubation with 10  $\mu$ M MKC8866 or 20  $\mu$ M 4 $\mu$ 8C and one hour of stimulation with 2  $\mu$ g/ml of either ssRNA40 or ssRNA41 and used for the assay of *uXBP1* and *sXBP1*. (B-D) Effect of 10  $\mu$ M MKC8866 on the mRNA expression of *IL1B*, *TNF*, and *IL6* mRNA. MDDCs were maintained for one hour in the presence of MKC8866 and then stimulated with ssRNA40 or ssRNA41 for 4 hours, prior to the extraction of the RNA for cytokine assays. Data are presented as mean  $\pm$  SEM. \* $p < 0.05$ , \*\* $p < 0.01$ . §Wilcoxon matched pairs signed rank test. ¶Paired *t* test two-ways. (E and F) Effect of MKC8866 on the expression of IL-6 and TNF $\alpha$  protein. MDDCs were preincubated with MKC8866 for one hour and then stimulated overnight with ssRNA40. At the end of this period, supernatants were collected for cytokine ELISA assay. Data are presented as mean  $\pm$  SEM. \* $p < 0.05$ . (G) Induction of the expression of pro-IL-1 $\beta$  by ssRNA40 and effect of MKC8866. MDDCs were treated as in the ELISA assays and after overnight incubation, cell extracts were collected and used for the assay of pro-IL-1 $\beta$  and  $\beta$ -actin proteins by Western blot.  $\beta$ -actin was used for normalization. A.U., arbitrary units. (H-K) Effect of MKC8866 and fluvoxamine on the expression of the mRNA encoding *IFNB1*, *IFNG*, *MX1* and *OAS1*. MDDCs were preincubated with 10  $\mu$ M MKC8866 and 20  $\mu$ M fluvoxamine for one hour and then stimulated with 2  $\mu$ g/ml ssRNA40 for 4 hours. At the end of this time, the RNA was extracted for mRNA assay. Data are presented as mean  $\pm$  SEM. \* $p < 0.05$ . ††Ratio paired *t* test. ¶Paired *t* test two-ways. ‡‡Mann Whitney test. (L-N) Effect of ssRNA40 on the binding of sXBP1 to the promoters of *IL1B*, *IL6*, and *TNF*. The captions below the graphs indicate the distance from transcription start to the nucleotide positions where PCR primers were selected. The defined sXBP1 binding sites included in the regions spanned by the primers are indicated. Samples were obtained after one hour stimulation by 2  $\mu$ g/ml ssRNA40. Data are presented as mean  $\pm$  SEM. \* $p < 0.05$ . ††Ratio paired *t* test.
